# Supplementary material for: [2+2] Cycloaddition or β-hydrogen elimination?—a DFT study of the reactions of propylene catalyzed by (PDI)Fe-metallacycle
Source: Royal Society of Chemistry journal article supplement (doi:10.1039/d1nj05646h), 2022-01-01
Supplement: d1nj05646h1.pdf [file d1nj05646h1.pdf]

## Supporting Information

[2+2] cycloaddition or  $\beta$ -hydrogen elimination? --DFT study on the reactions of propylene catalyzed by (PDI)Fe-metallacycle

for *New Journal of Chemistry*

Mingyang Jiao<sup>a,b,c</sup>, Zichen Wang<sup>a</sup>, BeiBei Zhang<sup>a</sup>, and Bo-Zhen Chen<sup>\*,a</sup>

<sup>a</sup>. School of Chemical Sciences, University of Chinese Academy of Sciences, No. 19A, YuQuan Road, Beijing 100049, P. R. China.

<sup>b</sup>. CAS Key Laboratory of Bio-based Materials, Qingdao Institute of Bioenergy and Bioprocess Technology, Chinese Academy of Sciences, Qingdao 266101, Shandong, China.

<sup>c</sup>. Shandong Energy Institute, Qingdao 266101, Shandong, China.

\* corresponding author. Email: bozhenchen@hotmail.com.

### Table of contents

|                                                       |               |
|-------------------------------------------------------|---------------|
| <b>Computational methods</b>                          | <b>S2</b>     |
| <b>Figure S1-S6</b>                                   | <b>S3-S5</b>  |
| <b>Table S1-S4</b>                                    | <b>S5-S7</b>  |
| <b>References</b>                                     | <b>S8</b>     |
| <b>Optimized coordinates of key stagnation points</b> | <b>S9-S34</b> |

## Computational methods

The calculations were mainly carried out using the Gaussian 09 program<sup>1</sup>. Considering that M052X is a proper calculation method for transition metal complexes<sup>2-3</sup>, geometries were optimized at M052X<sup>4-5</sup>/BS1 level in the gas phase (BS1 denotes a mixed basis set of SDD<sup>6-8</sup> for metal atoms and 6-31G(d, p) for nonmetal atoms). The vibrational frequency was calculated at the same level to confirm whether the optimized geometry is a minimum (no imaginary frequencies) or a transition state (only one imaginary frequency). The intrinsic reaction coordinate (IRC)<sup>9-10</sup> pathways have been traced to confirm whether the transition state connects the reactant, intermediate, or product.

The improved energetic results were calculated by the single-point energy calculations with the solvent effects obtained by PCM<sup>11-12</sup> solvent model at M052X/BS2. BS2 designates a mixed basis set of SDD for the Fe atom and 6-311+G(d, p) for nonmetal atoms. Our calculation uses benzene as a solvent to replace the solvent benzene-d<sup>6</sup> used in the experiment. The enthalpies and Gibbs free energies at 298 K and 1 atm at M052X/BS2 level were gotten from M052X/BS1 frequency analysis calculations. The Gibbs free energies at the M052X/BS2 level were used in the following discussion unless otherwise specified.

Furthermore, the improved single point energetic results for the structure of Fe catalyst were calculated by CASPT2<sup>13-14</sup> code of Molcas<sup>15</sup> based on geometries optimized by M052X/BS1. ANO-S<sup>16</sup> was used as the basis set. The structure of the catalyst was simplified in this calculation (Figure S1). An active space of (12e, 12o) was used. The corrected energy was got according to the formula  $E_{\text{full}} = E_{\text{full}}(\text{DFT}) + [E_{\text{trun}}(\text{CASPT2}) - E_{\text{trun}}(\text{DFT})]$  (the  $E_{\text{full}}$  is the energy after rectification; the  $E_{\text{full}}(\text{DFT})$  is the energy of the unsimplified catalyst at the DFT level; the  $E_{\text{trun}}(\text{CASPT2})$  is the energy calculated by CASPT2 for the simplified catalyst. The  $E_{\text{trun}}(\text{DFT})$  is the energy of the simplified catalyst at the DFT level).

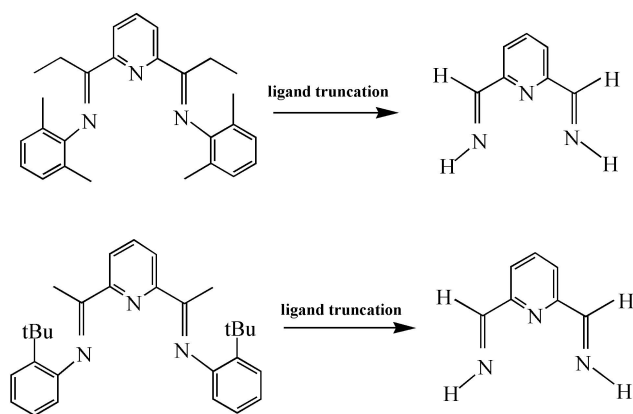

**Figure S1** The truncation of Fe catalyst

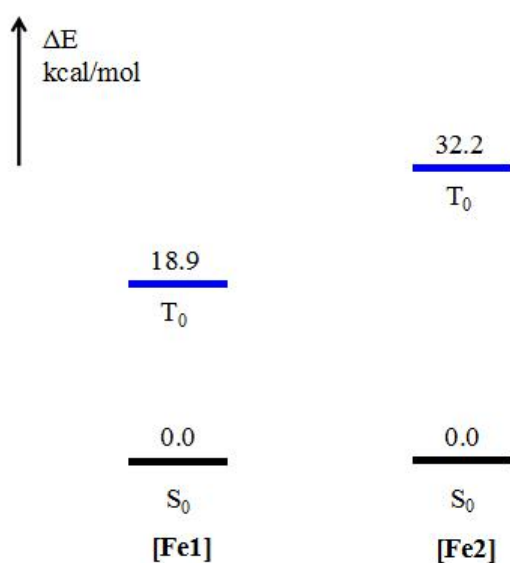

**Figure S2.** Energies of [Fe1] and [Fe2] in the singlet and triplet states after CASPT2 single point energy calculation correction.

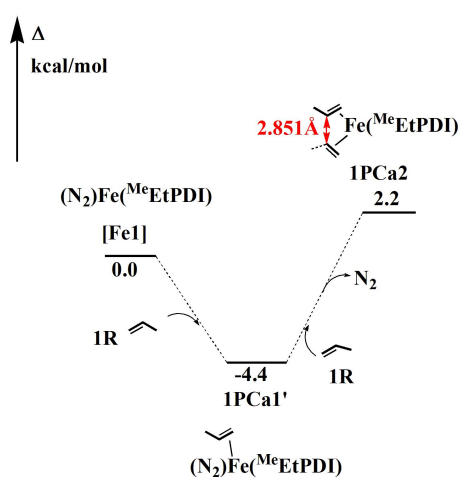

**Figure S3.** The association of 1PCa1' with [Fe1] and 1PCa2.

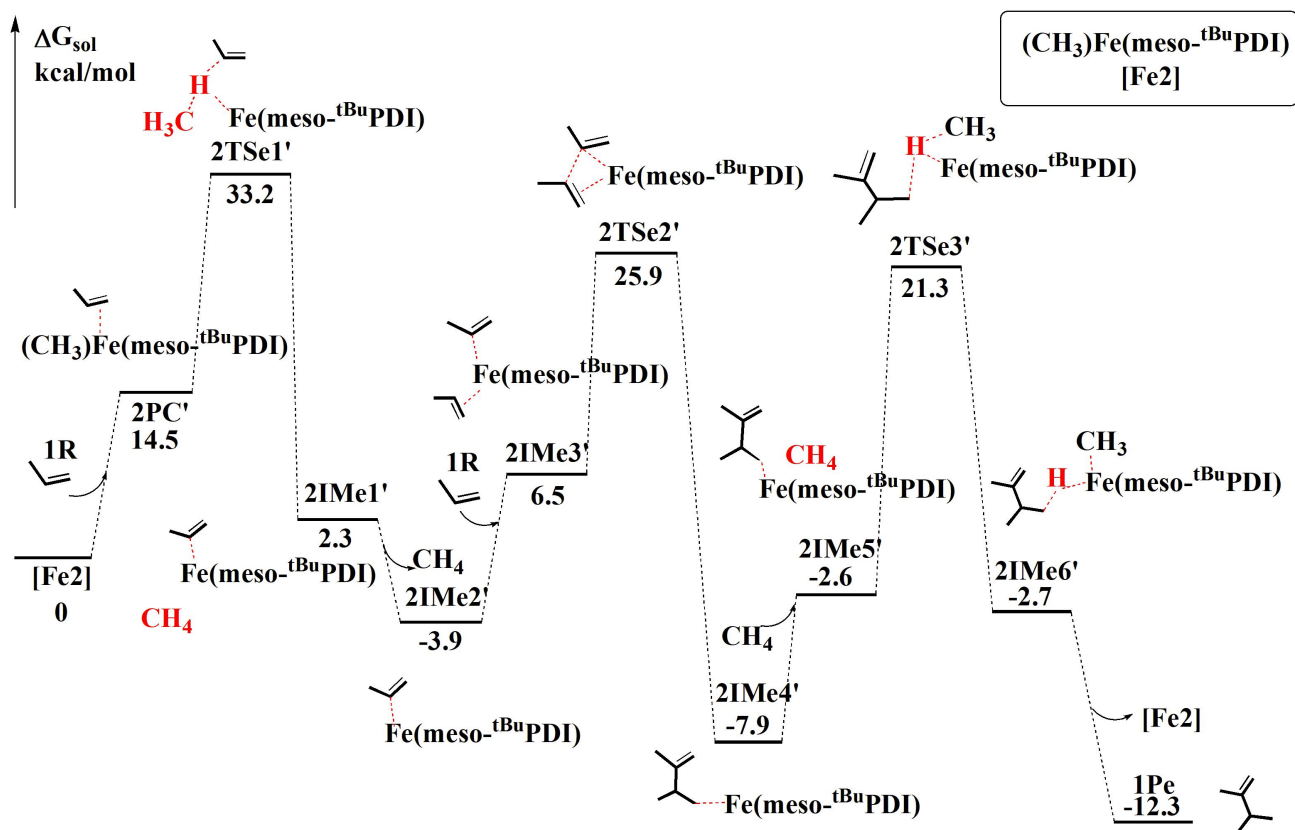

**Figure S4.** Free energy profiles for the  $\beta$ -hydrogen elimination reaction of **1R** under  $[\text{Fe}2]$  ( $[\text{Fe}2] = (\text{CH}_3)\text{Fe}(\text{meso-}^t\text{BuPDI})$ ). Energies are relative to  $[\text{Fe}2] + \text{1R}$  and are mass balanced. All energies are given in kcal/mol.

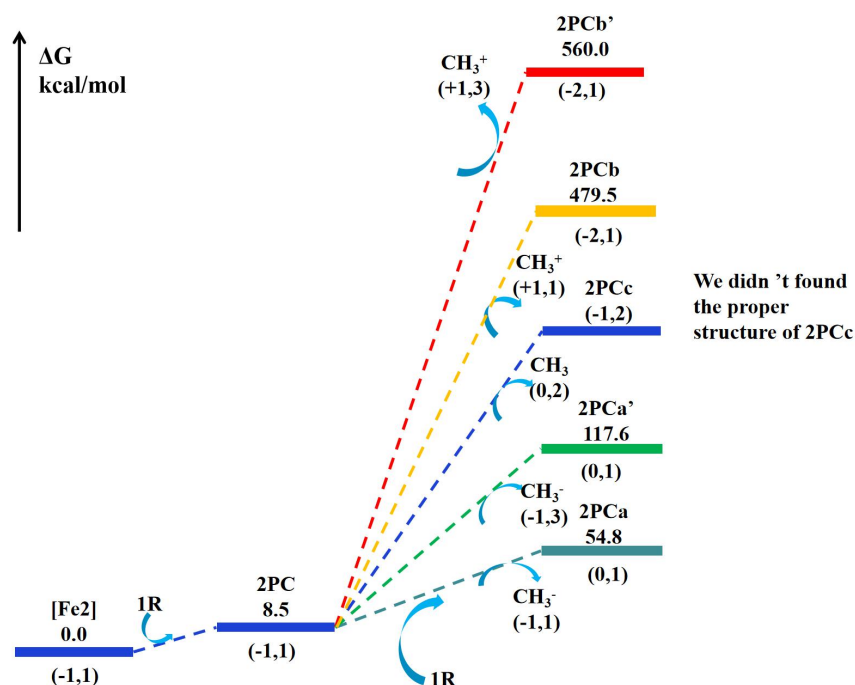

**Figure S5.** Free energy profiles for the reactions of **1R** and **2PC** to **2PCa**, **2PCa'**, **2PCb**, **2PCb'**, **2PCc** under  $[\text{Fe}2]$  ( $[\text{Fe}2] = (\text{CH}_3)\text{Fe}(\text{meso-}^t\text{BuPDI})$ ). Energies are relative to  $[\text{Fe}2] + \text{1R}$  and are mass balanced..

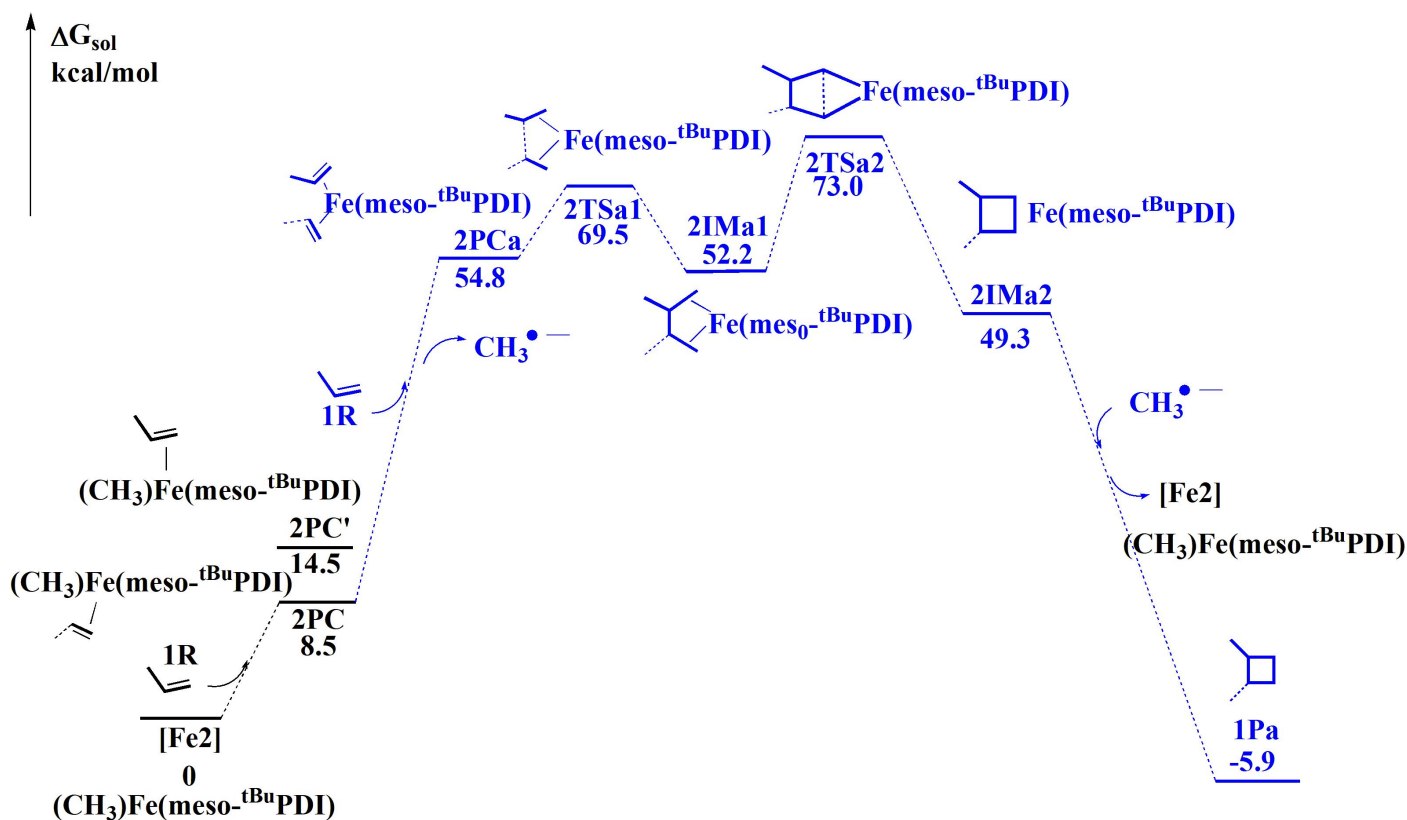

**Figure S6.** Free energy profiles for the [2+2] cycloaddition reaction of **1R** under **[Fe2]** (**[Fe2]** = **(CH<sub>3</sub>)Fe(meso-tBuPDI)**). Energies are relative to **[Fe2]**+**1R** and are mass balanced. In order to make the figure more concise, we only give the structure and energy of **2PC'**, and its association with other stationary points (**[Fe2]** and **2PCa**) is similar to **2PC**.

**Table S1.** The relative enthalpies and free energies for the stationary points along the reaction pathways of **1R** catalyzed by **[Fe1]** under M052X/6-31G(d, p) in gas. All values are given in kcal/mol. Energies are relative to **[Fe1](S<sub>0</sub>)**+**1R(S<sub>0</sub>)** and are mass balanced.

| (0, 1)                      | $\Delta H$ | $\Delta G$ | (0, 3)                      | $\Delta H$ | $\Delta G$  | (0, 5)                      | $\Delta H$ | $\Delta G$  |
|-----------------------------|------------|------------|-----------------------------|------------|-------------|-----------------------------|------------|-------------|
| <b>[Fe1](S<sub>0</sub>)</b> | 0          | 0          | <b>[Fe1](T<sub>0</sub>)</b> | 0          | 0           | <b>[Fe1](Q<sub>0</sub>)</b> | 0          | 0           |
| <b>1PCa1(S<sub>0</sub>)</b> | -21.9      | -6.4       | <b>1PCa1(T<sub>0</sub>)</b> | -23.1      | -11.9       | <b>1PCa1(Q<sub>0</sub>)</b> | -4.4       | 6.6         |
| <b>1PCa2(S<sub>0</sub>)</b> | -15.7      | 2.2        | <b>1PCa2(T<sub>0</sub>)</b> | -34.0      | -19.6       | <b>1PCa2(Q<sub>0</sub>)</b> | -13.7      | -0.7        |
| <b>1TSA1(S<sub>0</sub>)</b> | -2.9       | 18.3       | <b>1TSA1(T<sub>0</sub>)</b> | 24.9       | <b>43.1</b> | <b>1TSA1(Q<sub>0</sub>)</b> | 2.7        | 18.9        |
| <b>1IMa1(S<sub>0</sub>)</b> | -16.9      | 1.1        | <b>1IMa1(T<sub>0</sub>)</b> | -19.4      | -0.9        | <b>1IMa1(Q<sub>0</sub>)</b> | -30.1      | -14.9       |
| <b>1TSA2(S<sub>0</sub>)</b> | 3.4        | 22.7       | <b>1TSA2(T<sub>0</sub>)</b> | 9.1        | 27.1        | <b>1TSA2(Q<sub>0</sub>)</b> | 9.6        | <b>28.2</b> |
| <b>1IMa2(S<sub>0</sub>)</b> | -24.3      | -7.9       | <b>1IMa2(T<sub>0</sub>)</b> | -4.1       | 12.6        | <b>1IMa2(Q<sub>0</sub>)</b> | -14.7      | 1.5         |
| <b>1Pa(S<sub>0</sub>)</b>   | -19.9      | -5.9       | <b>1Pa(S<sub>0</sub>)</b>   | -19.9      | -5.9        | <b>1Pa(S<sub>0</sub>)</b>   | -19.9      | -5.9        |

**Table S2.** The structure parameter of **[Fe2]** based on different charge and spin multiplicity under M052x method. According to the calculation, the important parameter angle of N2-Fe1-C30 was close to the experimental value 149° .

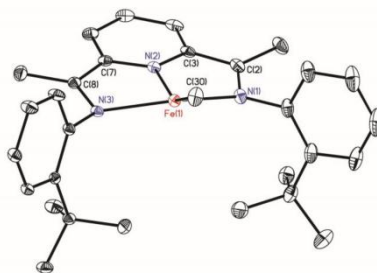

|                     | Exp.   | (-1, 1) <sup>a</sup> | (-1, 3) | (-1, 5) | (0, 2) | (0, 4) | (0, 6) |
|---------------------|--------|----------------------|---------|---------|--------|--------|--------|
| Fe(1)-N(1)/ Å       | 2.181  | 2.051                | 2.046   | 2.062   | 2.098  | 2.054  | 2.349  |
| Fe(1)-N(3)/ Å       | 2.141  | 2.051                | 2.030   | 1.957   | 2.026  | 2.129  | 2.202  |
| Fe(1)-N(2)/ Å       | 1.986  | 1.848                | 1.934   | 1.957   | 1.931  | 1.958  | 2.120  |
| Fe(1)-C(30)/ Å      | 2.031  | 2.001                | 2.031   | 2.043   | 2.004  | 2.021  | 2.067  |
| N(3)-Fe(1)-C(30)/ ° | 109.02 | 99.97                | 101.96  | 103.11  | 102.82 | 101.24 | 114.56 |
| N(1)-Fe(1)-C(30)/ ° | 107.20 | 99.97                | 99.52   | 100.79  | 99.78  | 104.31 | 101.66 |
| N(2)-Fe(1)-C(30)/ ° | 149.44 | <b>149.09</b>        | 171.02  | 166.79  | 172.04 | 167.53 | 162.94 |

<sup>a</sup>(“-1” represents the charge and “1” represents the spin multiplicity)

**Table S3.** The relative enthalpies and free energies for the stationary points along the reaction pathways of **1R** catalyzed by **[Fe2]** under M052X/6-31G(d, p) in gas. All values are given in kcal/mol. Energies are relative to **[Fe2]+1R** and are mass balanced.

| (-1, 1)                | $\Delta H$ | $\Delta G$ | (-1, 3)                | $\Delta H$ | $\Delta G$  | (-1, 5)                | $\Delta H$ | $\Delta G$  |
|------------------------|------------|------------|------------------------|------------|-------------|------------------------|------------|-------------|
| [Fe2](S <sub>0</sub> ) | 0          | 0          | [Fe2](T <sub>0</sub> ) | 0          | 0           | [Fe2](Q <sub>0</sub> ) | 0          | 0           |
| 2PC(S <sub>0</sub> )   | -6.2       | 8.5        | 2PC(T <sub>0</sub> )   | -7.5       | -7.5        | 2PC(Q <sub>0</sub> )   | 12.9       | 21.8        |
| 2PC'(S <sub>0</sub> )  | -1.1       | 14.5       | 2PC'(T <sub>0</sub> )  | 24.2       | 11.9        | 2PC'(Q <sub>0</sub> )  | 30.1       | 39.7        |
| 2TSe1(S <sub>0</sub> ) | 20.0       | 33.5       | 2TSe1(T <sub>0</sub> ) | 36.8       | <b>48.7</b> | 2TSe1(Q <sub>0</sub> ) | 27.7       | <b>39.3</b> |
| 2IMe5(S <sub>0</sub> ) | -29.2      | -5.2       | 2IMe5(T <sub>0</sub> ) | -41.1      | -42.3       | 2IMe5(Q <sub>0</sub> ) | 7.5        | 29.0        |
| 2TSe3(S <sub>0</sub> ) | -7.3       | 20.2       | 2TSe3(T <sub>0</sub> ) | 13.8       | <b>14.5</b> | 2TSe3(Q <sub>0</sub> ) | 41.2       | <b>67.8</b> |
| 2IMe6(S <sub>0</sub> ) | -25.1      | 1.0        | 2IMe6(T <sub>0</sub> ) | -31.2      | -35.0       | 2IMe6(Q <sub>0</sub> ) | 4.7        | 28.7        |
| 1Pe(S <sub>0</sub> )   | -24.9      | -12.3      | 1Pe(S <sub>0</sub> )   | -24.9      | -12.3       | 1Pe(S <sub>0</sub> )   | -24.9      | -12.3       |

| (0, 2)                 | $\Delta H$ | $\Delta G$  | (0, 4)                 | $\Delta H$ | $\Delta G$  |
|------------------------|------------|-------------|------------------------|------------|-------------|
| [Fe2](D <sub>0</sub> ) | 0.0        | 0.0         | [Fe2](Q <sub>0</sub> ) | 0.0        | 0.0         |
| 2PC(D <sub>0</sub> )   | 5.6        | 20.0        | 2PC(Q <sub>0</sub> )   | -5.8       | 4.1         |
| 2PC'(D <sub>0</sub> )  | -4.1       | 7.7         | 2PC'(Q <sub>0</sub> )  | 6.2        | 18.7        |
| 2TSe1(D <sub>0</sub> ) | 60.4       | <b>73.1</b> | 2TSe1(Q <sub>0</sub> ) | 32.7       | <b>45.8</b> |
| 2IMe5(D <sub>0</sub> ) | 10.0       | 32.1        | 2IMe5(Q <sub>0</sub> ) | -27.7      | -4.0        |
| 2TSe3(D <sub>0</sub> ) | 17.9       | <b>44.4</b> | 2TSe3(Q <sub>0</sub> ) | 5.9        | <b>34.2</b> |
| 2IMe6(D <sub>0</sub> ) | -28.1      | -4.2        | 2IMe6(Q <sub>0</sub> ) | -20.7      | 5.0         |
| 1Pe(S <sub>0</sub> )   | -24.9      | -12.3       | 1Pe(S <sub>0</sub> )   | -24.9      | -12.3       |

**Table S4** The NBO charge of the key stationary point along the reaction pathway catalyzed by **[Fe1]** and **[Fe2]**

| Catalysts    | Reactions                                                        | Atoms        | 1PCa1        | 1TSa1        | 1IMa1        | 1TSa2        | 1IMa2        |
|--------------|------------------------------------------------------------------|--------------|--------------|--------------|--------------|--------------|--------------|
| <b>[Fe1]</b> | <b>1PCa1</b> → <b>1IMa2</b><br>[2+2] cycloaddition               | C1-C4        | -1.235       | -1.409       | -1.865       | -1.221       | -1.258       |
|              |                                                                  | Fe           | 0.353        | 0.162        | 0.454        | 0.318        | 0.494        |
|              |                                                                  | N1           | -0.547       | -0.474       | -0.432       | -0.553       | -0.601       |
|              |                                                                  | N2           | -0.515       | -0.367       | -0.372       | -0.520       | -0.567       |
|              |                                                                  | N3           | -0.560       | -0.475       | -0.433       | -0.545       | -0.587       |
|              | <b>1PCa</b> → <b>1IMa2</b><br>β-hydrogen<br>elimination reaction | <b>Atoms</b> | <b>1PCa1</b> | <b>1TSa1</b> | <b>1IMa1</b> | <b>1TSe2</b> | <b>1IMa2</b> |
|              |                                                                  | C1-C4        | -1.235       | -1.409       | -1.865       | -1.240       | -1.258       |
|              |                                                                  | Fe           | 0.353        | 0.162        | 0.454        | -0.097       | 0.494        |
|              |                                                                  | N1           | -0.547       | -0.474       | -0.432       | -0.470       | -0.601       |
|              |                                                                  | N2           | -0.515       | -0.367       | -0.372       | -0.445       | -0.567       |
| N3           | -0.560                                                           | -0.475       | -0.433       | -0.474       | -0.587       |              |              |
| <b>[Fe2]</b> | <b>2PCa1</b> → <b>2IMa2</b><br>[2+2] cycloaddition               | <b>Atoms</b> | <b>2PCa1</b> | <b>2TSa1</b> | <b>2IMa1</b> | <b>2TSa2</b> | <b>2IMa2</b> |
|              |                                                                  | C1-C4        | -1.153       | -0.909       | -1.871       | -1.230       | -1.258       |
|              |                                                                  | Fe           | 0.116        | -0.002       | 0.451        | 0.311        | 0.507        |
|              |                                                                  | N1           | -0.576       | -0.493       | -0.436       | -0.547       | -0.599       |
|              |                                                                  | N2           | -0.524       | -0.366       | -0.379       | -0.516       | -0.576       |
|              | N3                                                               | -0.670       | -0.590       | -0.444       | -0.555       | -0.603       |              |
|              | <b>2PCe</b> → <b>2IMe6</b><br>β-hydrogen<br>elimination reaction | <b>Atoms</b> | <b>2IMe5</b> | <b>2TSe</b>  | <b>2IMe6</b> |              |              |
|              |                                                                  | C1-C4        | -1.568       | -1.478       | -1.298       |              |              |
|              |                                                                  | Fe           | 0.708        | 0.394        | 0.599        |              |              |
|              |                                                                  | N1           | -0.600       | -0.565       | -0.585       |              |              |
| N2           |                                                                  | -0.706       | -0.657       | -0.667       |              |              |              |
| N3           | -0.654                                                           | -0.610       | -0.608       |              |              |              |              |

## References

- 1 Frisch, M J; Trucks, G W, Schlegel, H B, Scuseria, G E, Robb, M A, Cheeseman, J R, Scalmani, G, Barone, V, Mennucci, B, Petersson, G A.; Nakatsuji, H, Caricato, M, Li, X, Hratchian, H P, Izmaylov, A F, Bloino, J, Zheng, G, Sonnenberg, J L, Hada, M, Ehara, M, Toyota, K, Fukuda, R, Hasegawa, J, Ishida, M, Nakajima, T, Honda, Y, Kitao, O, Nakai, H, Vreven, T, Montgomery, J A J; Peralta, J E, Ogliaro, F, Bearpark, M, Heyd, J J, Brothers, E, Kudin, K N, Staroverov, V N, Kobayashi, R, Normand, J, Raghavachari, K, Rendell, A, Burant, J C, Iyengar, S S, Tomasi, J, Cossi, M, Rega, N, Millam, J M, Klene, M, Knox, J E, Cross, J B, Bakken, V, Adamo, C, Jaramillo, J, Gomperts, R, Stratmann, R E, Yazyev, O, Austin, A J, Cammi, R, Pomelli, C, Ochterski, J W, Martin, R L, Morokuma, K, Zakrzewski, V G, Voth, G A, Salvador, P, Dannenberg, J J, Dapprich, S, Daniels, A D, Farkas, Ö, Foresman, J B, Ortiz, J V, Cioslowski, J, Fox, D. J.; Gaussian 09, Revision A.1, Gaussian, Inc., Wallingford CT, 2009.
- 2 Marković, J. M. D.; Marković, Z. S.; Pašti, I. A.; Brdarić, T. P.; Popović-Bijelić, A.; Mojovića, M. A joint application of spectroscopic, electrochemical and theoretical approaches in evaluation of the radical scavenging activity of 3-OH flavones and their iron complexes towards different radical species. *Dalton Trans*, 2012, 41: 7295-7303.
- 3 Malar, E. J. P.; Jacob, R.; Balasubramanian, S. DFT studies on the structure and stability of tetraaza macrocyclic nickel(II) complexes containing dicarbinolamine ligand moiety. *J Chem Sci*, 2019, 131: 110.
- 4 Zhao, Y.; Schultz, N. E.; Truhlar, D. G. Design of density functionals by combining the method of constraint satisfaction with parametrization for thermochemistry, thermochemical kinetics, and noncovalent interactions. *J Chem Theory Comput*, 2006, 2: 364-382.
- 5 Zhao, Y.; Truhlar, D. G. Density Functionals for noncovalent interaction energies of biological importance. *J Chem Theory Comput*, 2007, 3: 289-300.
- 6 Fuentealba, P.; Preuss, H.; Stoll, H, et al. A proper account of corepolarization with pseudopotentials: single valence-electron alkali compounds. *Chem Phys Lett*, 1982, 89: 418-422.
- 7 Vonszentpaly, L.; Fuentealba, P.; Preuss, H.; et al. Pseudopotential calculations on  $Rb_2^+$ ,  $Cs_2^+$ ,  $RbH^+$ ,  $CsH^+$  and the mixed alkali dimer ion. *Chem Phys Lett*. 1982, 93: 555-559.
- 8 Fuentealba, P.; Stoll, H.; Vonszentpaly, L.; et al. On the reliability of semi-empirical pseudopotentials: simulation of Hartree-Fock and Dirac-Fock results. *J Phys B*, 1983, 16: L323-L328.
- 9 Gonzalez, C.; Schlegel, H. B. An improved algorithm for reaction path following. *J Chem Phys*, 1989, 90: 2154-2161.
- 10 Gonzalez, C.; Schlegel, H. B. Reaction path following in mass-weighted internal coordinates. *J Phys Chem*, 1990, 94: 5523-5527.
- 11 Miertus, S.; Scrocco, E.; Tomasi, J. Electrostatic interaction of a solute with a continuum a direct utilization of Ab-initio molecular potentials for the prevision of solvent effects. *J Chem Phys*, 1981, 55: 117-129.
- 12 Cammi, R.; Tomasi, J. Analytical derivatives for molecular solutes. I. Hartree-Fock energy first derivatives with respect to external parameters in the polarizable continuum model. *J Chem Phys*, 1994, 100: 7495-7502.
- 13 Kaiser, E. W. Formation of  $C_3H_6$  from the Reaction  $C_3H_7 + O_2$  between 450 and 550 K. *J Phys Chem A*, 1998, 102: 5903-5906.
- 14 Knyazev, V. D.; Bencsura, A.; Slagle, I. R. Kinetics and thermochemistry of the reactions of  $CH_3CCl_2$  and  $(CH_3)_2CCl$  radicals with molecular oxygen. *J Phys Chem A*, 1998, 102: 1760-1769.
- 15 Karlstrom, G.; Lindh, R.; Malmqvist, P. A.; et al. MOLCAS: a program package for computational chemistry. *Comp Mat Sci*, 2003, 28: 222-239.
- 16 Pierloot, K.; Dumez, B.; Widmark, P.-O.; et al. Density matrix averaged atomic natural orbital (ANO) basis sets for correlated molecular wave functions IV. Medium size basis sets for the atoms H-Kr. *Theor Chim Acta*, 1995, 90: 87-114.



## Optimized coordinates

### [Fe1]

O 1

|    |             |             |             |
|----|-------------|-------------|-------------|
| Fe | 0.08497600  | -0.09189000 | -0.11809100 |
| N  | 0.04184400  | -1.68035400 | -1.24335200 |
| N  | 0.03656100  | -2.53623500 | -1.93348800 |
| N  | 2.02558000  | 0.23984900  | -0.20225300 |
| C  | 1.27847000  | 2.40641000  | -0.11029300 |
| C  | -1.13065200 | 2.39812000  | 0.04010300  |
| C  | 1.27188200  | 3.79740600  | -0.05429300 |
| C  | -1.14159100 | 3.77843700  | 0.09721600  |
| C  | 0.06738200  | 4.49250000  | 0.03541000  |
| H  | 2.20894100  | 4.34057400  | -0.07330700 |
| H  | -2.08052200 | 4.30964500  | 0.19546900  |
| H  | 0.06274200  | 5.57258300  | 0.07631900  |
| N  | 0.06861100  | 1.70733000  | -0.09543500 |
| C  | 2.38710300  | 1.52432500  | -0.12468700 |
| C  | 3.78818400  | 1.98332900  | 0.17361400  |
| H  | 4.51554700  | 1.33522000  | -0.30997400 |
| H  | 3.93699100  | 2.98747200  | -0.22674700 |
| C  | 4.03846800  | 1.97900300  | 1.68953200  |
| H  | 3.91689400  | 0.96951900  | 2.08718600  |
| H  | 5.05015800  | 2.31737000  | 1.91936300  |
| H  | 3.32564500  | 2.63432700  | 2.19189000  |
| C  | 2.89615400  | -0.85221800 | -0.03719300 |
| C  | 2.53276600  | -1.73941600 | 0.99958600  |
| C  | 3.28314100  | -2.88558900 | 1.22350200  |
| C  | 4.37822800  | -3.17713900 | 0.41283400  |
| C  | 4.69297200  | -2.33131800 | -0.64123800 |
| C  | 3.95850800  | -1.16953800 | -0.89808900 |
| H  | 3.00565500  | -3.55571500 | 2.02924800  |
| H  | 4.96170600  | -4.07224200 | 0.58654600  |
| H  | 5.51243700  | -2.58261200 | -1.30610900 |
| C  | 1.32088300  | -1.41573700 | 1.83802300  |
| H  | 1.37024400  | -0.41378500 | 2.26541900  |
| H  | 0.36557900  | -1.50573200 | 1.26640100  |
| H  | 1.19476600  | -2.14116000 | 2.64242600  |
| C  | 4.26185300  | -0.35790700 | -2.13379900 |
| H  | 3.46252700  | 0.35193500  | -2.34217500 |
| H  | 5.19816300  | 0.19742400  | -2.03886700 |
| H  | 4.36663200  | -1.02297700 | -2.99279000 |
| C  | -2.23917900 | 1.50005100  | 0.11628900  |
| C  | -3.66052800 | 1.98200800  | 0.23391000  |
| H  | -4.26711600 | 1.20671100  | 0.70438000  |

|   |             |             |             |
|---|-------------|-------------|-------------|
| H | -3.68304600 | 2.85432000  | 0.88988400  |
| C | -4.26027200 | 2.34416900  | -1.13194200 |
| H | -4.29322700 | 1.46619900  | -1.77674500 |
| H | -5.27660200 | 2.72389200  | -1.01754000 |
| H | -3.65552100 | 3.10550200  | -1.62623900 |
| N | -1.89624900 | 0.22331300  | 0.02594600  |
| C | -2.87007600 | -0.80424200 | 0.14058800  |
| C | -3.22041900 | -1.25231600 | 1.42855000  |
| C | -3.39104200 | -1.42578800 | -1.00327900 |
| C | -4.10807600 | -2.31708300 | 1.55303500  |
| C | -4.27859200 | -2.49216500 | -0.83677900 |
| C | -4.63926100 | -2.93841700 | 0.42619600  |
| H | -4.38070900 | -2.66262700 | 2.54370100  |
| H | -4.68555000 | -2.97410200 | -1.71905800 |
| H | -5.32674200 | -3.76778700 | 0.53526500  |
| C | -3.02225900 | -0.97648600 | -2.39660400 |
| H | -2.63424500 | -1.81593600 | -2.97742700 |
| H | -3.90109000 | -0.59869000 | -2.92433700 |
| H | -2.26840100 | -0.19061800 | -2.37551700 |
| C | -2.64055400 | -0.57802100 | 2.64510800  |
| H | -1.55313800 | -0.50291200 | 2.57191400  |
| H | -3.01557400 | 0.44302000  | 2.75196100  |
| H | -2.89791900 | -1.13127300 | 3.54808000  |

Zero-point correction= 0.536035 Hartree

Sum of electronic and thermal Free Energies= -1444.595171 Hartree

Number of imaginary frequencies= 0

### 1R

O 1

|   |             |             |             |
|---|-------------|-------------|-------------|
| C | 1.27427900  | -0.22320200 | -0.00004800 |
| H | 1.27811700  | -1.30779700 | 0.00004700  |
| H | 2.23509900  | 0.27555100  | 0.00019700  |
| C | 0.13488900  | 0.46014000  | -0.00003400 |
| H | 0.17031800  | 1.54630800  | 0.00010100  |
| C | -1.22951900 | -0.16311900 | -0.00003400 |
| H | -1.16111400 | -1.25136600 | -0.00123000 |
| H | -1.79956000 | 0.14609700  | 0.87959500  |
| H | -1.80075500 | 0.14828500  | -0.87801300 |

Zero-point correction= 0.081048 Hartree

Sum of electronic and thermal Free Energies= -117.829839 Hartree

Number of imaginary frequencies= 0

### 1PCa1

|     |             |             |             |                                              |             |             |                      |
|-----|-------------|-------------|-------------|----------------------------------------------|-------------|-------------|----------------------|
| 0 1 |             |             |             | H                                            | 5.44959400  | 2.68096300  | 1.12351200           |
| 0 1 |             |             |             | H                                            | 3.83989600  | 3.02595600  | 1.77970100           |
| Fe  | 0.03363700  | -0.08602100 | 0.30930100  | N                                            | 2.07766900  | 0.21954800  | 0.01803500           |
| N   | -2.00626800 | 0.32851400  | 0.01859900  | C                                            | 3.04254700  | -0.71004800 | -0.46404300          |
| C   | -1.09773600 | 2.45405700  | 0.01131800  | C                                            | 3.21612800  | -0.80231000 | -1.86386200          |
| C   | 1.28595500  | 2.39288000  | 0.01451900  | C                                            | 3.77476400  | -1.54399100 | 0.39042900           |
| C   | -1.07548500 | 3.83953700  | 0.04294500  | C                                            | 4.07614000  | -1.76956100 | -2.37643400          |
| C   | 1.32558000  | 3.78337700  | 0.04630500  | C                                            | 4.63041700  | -2.50092600 | -0.16119900          |
| C   | 0.14525000  | 4.52316000  | 0.04690000  | C                                            | 4.77647600  | -2.62739700 | -1.53383600          |
| H   | -2.00677800 | 4.39143000  | 0.06373600  | H                                            | 4.19708200  | -1.84667000 | -3.45121900          |
| H   | 2.28264900  | 4.28915700  | 0.07957300  | H                                            | 5.19329400  | -3.14344800 | 0.50744300           |
| H   | 0.17083700  | 5.60341900  | 0.06811100  | H                                            | 5.43911300  | -3.37758300 | -1.94689800          |
| N   | 0.07453600  | 1.71411300  | -0.05211800 | C                                            | 3.70126900  | -1.39489700 | 1.88645500           |
| C   | -2.26360400 | 1.62460800  | -0.00253300 | H                                            | 3.03758100  | -0.57654800 | 2.15523500           |
| C   | -3.64732600 | 2.22013900  | -0.09541100 | H                                            | 3.33683100  | -2.30893700 | 2.35910100           |
| H   | -4.37407000 | 1.50656900  | 0.29239800  | H                                            | 4.69378000  | -1.18892100 | 2.29468900           |
| H   | -3.68644100 | 3.09783400  | 0.55272200  | C                                            | 2.50168400  | 0.14703900  | -2.79400600          |
| C   | -4.03666900 | 2.61798800  | -1.52522400 | H                                            | 1.48165800  | 0.34681700  | -2.45737300          |
| H   | -4.11968800 | 1.73363100  | -2.15516800 | H                                            | 3.01603600  | 1.11179500  | -2.83475200          |
| H   | -4.99988200 | 3.13030500  | -1.52946700 | H                                            | 2.47750400  | -0.25982400 | -3.80525500          |
| H   | -3.28696000 | 3.27953700  | -1.96119500 | C                                            | -0.07180300 | 0.57170900  | 2.36965000           |
| C   | -3.07773500 | -0.58185900 | -0.20586800 | H                                            | 0.88893800  | 0.99447500  | 2.65031200           |
| C   | -3.29921400 | -1.05490600 | -1.51505000 | H                                            | -0.87622400 | 1.27913900  | 2.22005000           |
| C   | -4.25842600 | -2.04715800 | -1.71937600 | C                                            | -0.29760300 | -0.76652700 | 2.49632800           |
| C   | -5.01393900 | -2.54787400 | -0.66704800 | H                                            | -1.30874600 | -1.12595800 | 2.35737900           |
| C   | -4.83136300 | -2.02841300 | 0.60740400  | C                                            | 0.62416200  | -1.67435200 | 3.27032000           |
| C   | -3.87770800 | -1.04116200 | 0.85626500  | H                                            | 0.11345900  | -1.97792600 | 4.18883900           |
| H   | -4.41307000 | -2.42272800 | -2.72503100 | H                                            | 0.90228800  | -2.58487800 | 2.74129900           |
| H   | -5.75075600 | -3.32174900 | -0.84198400 | H                                            | 1.53162200  | -1.14978000 | 3.56016700           |
| H   | -5.43954900 | -2.38456500 | 1.43195000  | C                                            | 0.14560600  | -2.41433400 | 0.21234300           |
| C   | -2.55465200 | -0.50435000 | -2.71087900 | H                                            | 1.14033000  | -2.55796300 | 0.62409900           |
| H   | -1.73111100 | 0.14187500  | -2.40999300 | C                                            | 0.03877200  | -1.83859300 | -1.01850200          |
| H   | -2.15675200 | -1.31644800 | -3.32319600 | H                                            | 0.91076400  | -1.58150700 | -1.60002100          |
| H   | -3.23306000 | 0.06907700  | -3.34667300 | H                                            | -0.91131700 | -1.87777100 | -1.53135900          |
| C   | -3.77883900 | -0.46808000 | 2.25014300  | C                                            | -0.97057200 | -3.26046100 | 0.77554900           |
| H   | -3.01746900 | 0.30531100  | 2.32005900  | H                                            | -1.03751800 | -3.22836800 | 1.86284000           |
| H   | -4.73644100 | -0.02812700 | 2.53891600  | H                                            | -1.93326300 | -2.96130800 | 0.35927100           |
| H   | -3.54841800 | -1.24755600 | 2.98001800  | H                                            | -0.79423600 | -4.30360500 | 0.49669700           |
| C   | 2.39811800  | 1.51078600  | -0.03192200 | Zero-point correction=                       |             |             | 0.696885 Hartree     |
| C   | 3.81183000  | 2.02457700  | -0.15170500 | Sum of electronic and thermal Free Energies= |             |             | -1570.727036 Hartree |
| H   | 4.42087100  | 1.29354500  | -0.68419700 | Number of imaginary frequencies=             |             |             | 0                    |
| H   | 3.81545500  | 2.93901900  | -0.74717700 |                                              |             |             |                      |
| C   | 4.43349900  | 2.29654800  | 1.22608600  |                                              |             |             |                      |
| H   | 4.47292300  | 1.37841000  | 1.81303200  |                                              |             |             |                      |

## 1PCa2

0 1

|    |             |             |             |                                              |             |              |             |
|----|-------------|-------------|-------------|----------------------------------------------|-------------|--------------|-------------|
| Fe | -0.01719500 | -0.05197400 | 0.27463300  | N                                            | 1.98821200  | 0.24348500   | -0.04029100 |
| N  | -2.00533700 | 0.29941000  | 0.07934300  | C                                            | 2.94596700  | -0.77509500  | -0.31583700 |
| C  | -1.18759300 | 2.44927900  | -0.04955700 | C                                            | 2.97076600  | -1.29767200  | -1.62573600 |
| C  | 1.20804100  | 2.41484900  | -0.14019800 | C                                            | 3.80602000  | -1.28633600  | 0.66666500  |
| C  | -1.17930500 | 3.83232100  | -0.16948800 | C                                            | 3.81209700  | -2.36890000  | -1.91049800 |
| C  | 1.22818000  | 3.79522700  | -0.27740300 | C                                            | 4.63476100  | -2.36435500  | 0.34224500  |
| C  | 0.03145400  | 4.51814700  | -0.29135500 | C                                            | 4.63434600  | -2.91516400  | -0.92945100 |
| H  | -2.11517900 | 4.37720800  | -0.18326500 | H                                            | 3.82422600  | -2.77373900  | -2.91597800 |
| H  | 2.17393600  | 4.31180800  | -0.38277600 | H                                            | 5.29161100  | -2.76365900  | 1.10749200  |
| H  | 0.04320800  | 5.59374800  | -0.39717200 | H                                            | 5.27849800  | -3.75386400  | -1.16187900 |
| N  | 0.00259000  | 1.73351800  | -0.05896300 | C                                            | 3.91226500  | -0.67988200  | 2.04420200  |
| C  | -2.32125000 | 1.58564800  | -0.00289400 | H                                            | 3.12356000  | 0.04717700   | 2.22265600  |
| C  | -3.72573000 | 2.09936200  | -0.18012900 | H                                            | 3.86100000  | -1.44892300  | 2.81725900  |
| H  | -4.42769700 | 1.42618000  | 0.31152100  | H                                            | 4.87374900  | -0.17273800  | 2.15597100  |
| H  | -3.81448000 | 3.07012900  | 0.31057100  | C                                            | 2.13658700  | -0.66971300  | -2.71226500 |
| C  | -4.09929700 | 2.22711800  | -1.66391300 | H                                            | 1.09185700  | -0.56979100  | -2.41345900 |
| H  | -4.07992500 | 1.24800000  | -2.14299700 | H                                            | 2.49165400  | 0.34108900   | -2.93173100 |
| H  | -5.10189800 | 2.64288600  | -1.77519800 | H                                            | 2.19637100  | -1.25851800  | -3.62744800 |
| H  | -3.39122200 | 2.87552600  | -2.18182800 | C                                            | 0.05794800  | 0.22782100   | 2.37931200  |
| C  | -3.02204100 | -0.69238700 | -0.00193300 | H                                            | 1.07018800  | 0.54049900   | 2.60549700  |
| C  | -3.18538600 | -1.39505000 | -1.21139200 | H                                            | -0.70802300 | 0.98499200   | 2.48969200  |
| C  | -4.11490200 | -2.43333900 | -1.26718000 | C                                            | -0.25511200 | -1.09421700  | 2.23652600  |
| C  | -4.87629800 | -2.77936300 | -0.15894300 | H                                            | -1.30323800 | -1.37340300  | 2.19668700  |
| C  | -4.72086600 | -2.06805400 | 1.02334100  | C                                            | 0.71573500  | -2.22317700  | 2.47285200  |
| C  | -3.80650800 | -1.01935800 | 1.12055900  | H                                            | 0.75021700  | -2.46869700  | 3.53796000  |
| H  | -4.23684400 | -2.97347400 | -2.19980300 | H                                            | 0.41383600  | -3.12597100  | 1.94174400  |
| H  | -5.58842400 | -3.59293300 | -0.21730700 | H                                            | 1.71948800  | -1.95910800  | 2.14677600  |
| H  | -5.31772200 | -2.32168700 | 1.89268000  | N                                            | -0.03988800 | -2.88942400  | -0.80659100 |
| C  | -2.40350200 | -1.04533400 | -2.45624200 | N                                            | -0.04774000 | -1.86706700  | -0.39572100 |
| H  | -1.72579300 | -0.21083000 | -2.28226800 | Zero-point correction=                       |             | 0.621118     | Hartree     |
| H  | -1.81584600 | -1.90150400 | -2.79478100 | Sum of electronic and thermal Free Energies= |             | -1562.434338 | Hartree     |
| H  | -3.08523400 | -0.78056900 | -3.26779600 | Number of imaginary frequencies=             |             |              | 0           |
| C  | -3.71862700 | -0.24443800 | 2.41357200  |                                              |             |              |             |
| H  | -2.81565300 | 0.35892800  | 2.46354000  | <b>1TSa1</b>                                 |             |              |             |
| H  | -4.57322200 | 0.43006200  | 2.51542500  | 0 1                                          |             |              |             |
| H  | -3.73473300 | -0.92182000 | 3.26897500  | Fe                                           | -0.01932200 | -0.03878400  | -0.19663200 |
| C  | 2.32042200  | 1.52151200  | -0.17909000 | N                                            | 2.02327100  | 0.36930200   | -0.06023500 |
| C  | 3.72370000  | 2.01456900  | -0.43352300 | C                                            | 1.10871600  | 2.48503500   | -0.13709000 |
| H  | 4.34804100  | 1.17073200  | -0.72915600 | C                                            | -1.26048500 | 2.43415000   | -0.08427900 |
| H  | 3.70317000  | 2.70887900  | -1.27723100 | C                                            | 1.08926700  | 3.87020500   | -0.21939700 |
| C  | 4.34830800  | 2.71413100  | 0.78412300  | C                                            | -1.30215700 | 3.82068400   | -0.14465300 |
| H  | 4.38953800  | 2.04073800  | 1.63899200  | C                                            | -0.12264700 | 4.55888000   | -0.21467000 |
| H  | 5.36480800  | 3.03834000  | 0.55534400  | H                                            | 2.02379600  | 4.41267900   | -0.28206100 |
| H  | 3.76730200  | 3.58725100  | 1.08017300  | H                                            | -2.25978300 | 4.32467300   | -0.13861100 |

|   |             |             |             |                                              |             |              |             |
|---|-------------|-------------|-------------|----------------------------------------------|-------------|--------------|-------------|
| H | -0.14672200 | 5.63795100  | -0.26835800 | H                                            | -5.50682500 | -3.42169800  | 1.62591800  |
| N | -0.05946700 | 1.75020500  | -0.05100000 | C                                            | -3.84609700 | -1.02474100  | -1.99328600 |
| C | 2.27893900  | 1.65636800  | -0.09137500 | H                                            | -2.98714300 | -0.41626400  | -2.26698400 |
| C | 3.65760000  | 2.26781700  | -0.02674700 | H                                            | -3.86290800 | -1.91986500  | -2.61649900 |
| H | 4.39844100  | 1.51337700  | -0.28883400 | H                                            | -4.75115000 | -0.45696600  | -2.22546500 |
| H | 3.71923100  | 3.05577200  | -0.78134900 | C                                            | -2.62462600 | 0.05187200   | 2.80307500  |
| C | 3.99063600  | 2.84892800  | 1.35452500  | H                                            | -1.61118600 | 0.32571700   | 2.50892200  |
| H | 4.00944400  | 2.05998300  | 2.10451400  | H                                            | -3.19988900 | 0.97764900   | 2.90315400  |
| H | 4.97109700  | 3.32664800  | 1.33755400  | H                                            | -2.59735000 | -0.42781200  | 3.78180800  |
| H | 3.24921400  | 3.58713200  | 1.66108400  | C                                            | 0.01098300  | -0.13948800  | -2.12723400 |
| C | 3.11140000  | -0.53598700 | 0.11365200  | H                                            | -0.93252000 | 0.13219400   | -2.59337100 |
| C | 3.45200100  | -0.96900200 | 1.40586800  | H                                            | 0.84887600  | 0.44861600   | -2.48758600 |
| C | 4.43568000  | -1.95178600 | 1.54405000  | C                                            | 0.22646900  | -1.55408800  | -1.86011300 |
| C | 5.09484800  | -2.47227100 | 0.44112600  | H                                            | 1.27022300  | -1.84516100  | -1.91493400 |
| C | 4.80053600  | -1.97782500 | -0.82515800 | C                                            | -0.67763200 | -2.51356400  | -2.61638400 |
| C | 3.82227100  | -1.00360500 | -1.00980900 | H                                            | -0.45415500 | -2.45117700  | -3.68434200 |
| H | 4.68336500  | -2.30155100 | 2.54032400  | H                                            | -0.55790900 | -3.55094600  | -2.30379800 |
| H | 5.84985300  | -3.23823800 | 0.56567800  | H                                            | -1.71976800 | -2.23946200  | -2.47586200 |
| H | 5.34338000  | -2.34354200 | -1.68918100 | C                                            | -0.05613800 | -2.31198400  | -0.04084600 |
| C | 2.82680500  | -0.39140600 | 2.65437400  | H                                            | -1.05715100 | -2.68552400  | -0.24310100 |
| H | 2.00091700  | 0.27875700  | 2.42264700  | C                                            | -0.00197700 | -1.48872800  | 1.15333800  |
| H | 2.45152500  | -1.18902600 | 3.29847900  | H                                            | -0.89528100 | -1.47569400  | 1.76106000  |
| H | 3.57846800  | 0.15592500  | 3.22821500  | H                                            | 0.91500000  | -1.56504400  | 1.72197700  |
| C | 3.59282700  | -0.42821800 | -2.38601400 | C                                            | 1.01671100  | -3.39199700  | -0.10761900 |
| H | 2.63477000  | -0.72735400 | -2.80922900 | H                                            | 1.06921400  | -3.90037600  | -1.07133100 |
| H | 3.60340200  | 0.66328100  | -2.36629100 | H                                            | 1.99738200  | -2.96506300  | 0.10625400  |
| H | 4.38011200  | -0.76244300 | -3.06163900 | H                                            | 0.80519200  | -4.14202800  | 0.65809600  |
| C | -2.38845400 | 1.55580700  | 0.01727400  | Zero-point correction=                       |             | 0.700356     | Hartree     |
| C | -3.78880400 | 2.10332000  | 0.14710000  | Sum of electronic and thermal Free Energies= |             | -1570.703645 | Hartree     |
| H | -4.44025000 | 1.32759900  | 0.54882700  | Number of imaginary frequencies=             |             | 1            |             |
| H | -3.78447500 | 2.92642000  | 0.86522000  |                                              |             |              |             |
| C | -4.34598400 | 2.59178300  | -1.19961200 | <b>1IMa1</b>                                 |             |              |             |
| H | -4.35695700 | 1.77978100  | -1.92546100 | 0 1                                          |             |              |             |
| H | -5.36648900 | 2.95741600  | -1.07784300 | Fe                                           | -0.00062900 | 0.00689800   | 0.10714000  |
| H | -3.73804400 | 3.39608900  | -1.61377100 | N                                            | 2.04230300  | 0.41842200   | 0.10953900  |
| N | -2.08003400 | 0.27864000  | 0.01237600  | C                                            | 1.17206700  | 2.53923700   | -0.29401000 |
| C | -3.07965300 | -0.66008000 | 0.40695800  | C                                            | -1.16634900 | 2.55280800   | -0.16691800 |
| C | -3.27702700 | -0.85664900 | 1.78970400  | C                                            | 1.19762900  | 3.91128400   | -0.53297900 |
| C | -3.83763600 | -1.37867700 | -0.52770700 | C                                            | -1.20383600 | 3.92607900   | -0.38812900 |
| C | -4.14788300 | -1.85975500 | 2.20767100  | C                                            | -0.00573900 | 4.60972600   | -0.58494000 |
| C | -4.69993000 | -2.37702400 | -0.06795900 | H                                            | 2.13793400  | 4.42887100   | -0.66490200 |
| C | -4.84180800 | -2.63738300 | 1.28685100  | H                                            | -2.14755600 | 4.45430900   | -0.40575100 |
| H | -4.28564800 | -2.02351600 | 3.27042100  | H                                            | -0.00983700 | 5.67604000   | -0.76579400 |
| H | -5.27583300 | -2.94108200 | -0.79349300 | N                                            | 0.00455200  | 1.88182500   | -0.13758600 |

|   |             |             |             |                                              |             |                      |             |
|---|-------------|-------------|-------------|----------------------------------------------|-------------|----------------------|-------------|
| C | 2.33678700  | 1.65575200  | -0.12820800 | H                                            | -3.13036200 | 0.09407300           | -2.06145200 |
| C | 3.72401800  | 2.24227300  | -0.11680600 | H                                            | -3.22690600 | -1.62508400          | -2.38578100 |
| H | 4.45020000  | 1.46316900  | -0.33438500 | H                                            | -4.70930800 | -0.67043800          | -2.32251500 |
| H | 3.80535100  | 2.99720300  | -0.90128400 | C                                            | -2.24488400 | -0.23546900          | 2.95182600  |
| C | 4.03812500  | 2.85371200  | 1.25747400  | H                                            | -1.20174200 | -0.46404800          | 2.71514100  |
| H | 4.04357700  | 2.07145100  | 2.01753400  | H                                            | -2.34878700 | 0.85255600           | 2.96725200  |
| H | 5.02066500  | 3.32599600  | 1.24749300  | H                                            | -2.46599200 | -0.61577500          | 3.94868700  |
| H | 3.29690700  | 3.60255400  | 1.54070800  | C                                            | 0.02548800  | -0.28234600          | -1.86008800 |
| C | 3.08073100  | -0.52556900 | 0.36145500  | H                                            | -0.97024300 | -0.09232300          | -2.27984500 |
| C | 3.20100200  | -0.99927600 | 1.67760400  | H                                            | 0.72422400  | 0.36875800           | -2.40575400 |
| C | 4.17912300  | -1.94875900 | 1.95617000  | C                                            | 0.37420300  | -1.76558300          | -2.02821100 |
| C | 5.00355000  | -2.44060300 | 0.94940000  | H                                            | 1.43902100  | -1.90725400          | -1.79234300 |
| C | 4.85210500  | -1.97746300 | -0.34971600 | C                                            | 0.13732800  | -2.25067400          | -3.46151100 |
| C | 3.89513200  | -1.01208600 | -0.67017600 | H                                            | 0.64123000  | -1.59419700          | -4.17658100 |
| H | 4.28055900  | -2.31536900 | 2.97093200  | H                                            | 0.50031600  | -3.26841000          | -3.62321700 |
| H | 5.75186700  | -3.18965900 | 1.17594700  | H                                            | -0.93307100 | -2.23266800          | -3.69379900 |
| H | 5.48043900  | -2.36801000 | -1.14214900 | C                                            | -0.39470500 | -2.56129400          | -0.96019000 |
| C | 2.26175600  | -0.51295700 | 2.74837500  | H                                            | -1.46568800 | -2.37107200          | -1.12370100 |
| H | 1.24810200  | -0.85544800 | 2.51865100  | C                                            | -0.00863500 | -1.99588300          | 0.42007500  |
| H | 2.55229700  | -0.90786400 | 3.72174900  | H                                            | -0.70162200 | -2.39610600          | 1.17562300  |
| H | 2.23657600  | 0.57744300  | 2.80788000  | H                                            | 0.98964400  | -2.38781100          | 0.67162400  |
| C | 3.77525200  | -0.52477600 | -2.09352300 | C                                            | -0.16388400 | -4.07186900          | -1.06063600 |
| H | 4.48847400  | 0.27924400  | -2.29940700 | H                                            | -0.54764400 | -4.50159800          | -1.99060800 |
| H | 3.99342800  | -1.33995100 | -2.78402600 | H                                            | 0.90813400  | -4.28808600          | -1.00243500 |
| H | 2.77469300  | -0.15633200 | -2.30986900 | H                                            | -0.65158600 | -4.58187300          | -0.22662500 |
| C | -2.32025000 | 1.67847300  | 0.10338500  | Zero-point correction=                       |             | 0.696978 Hartree     |             |
| C | -3.69108200 | 2.28030000  | 0.27794500  | Sum of electronic and thermal Free Energies= |             | -1570.729831 Hartree |             |
| H | -4.31141100 | 1.57975800  | 0.83691000  | Number of imaginary frequencies=             |             | 0                    |             |
| H | -3.58053800 | 3.18002900  | 0.88905300  |                                              |             |                      |             |
| C | -4.38061200 | 2.64035200  | -1.04703700 | <b>1TSa2</b>                                 |             |                      |             |
| H | -4.63947800 | 1.74162400  | -1.60267200 | 0 1                                          |             |                      |             |
| H | -5.29904500 | 3.19330300  | -0.84875000 | Fe                                           | -0.08632800 | 0.02251000           | -0.04488000 |
| H | -3.73923500 | 3.25471500  | -1.68043600 | N                                            | 1.86988200  | 0.56876300           | 0.15963500  |
| N | -2.02291600 | 0.42618300  | 0.23681700  | C                                            | 0.90375000  | 2.60363200           | -0.34018200 |
| C | -3.03976500 | -0.51677700 | 0.57588200  | C                                            | -1.48405300 | 2.43061700           | -0.28375000 |
| C | -3.15176400 | -0.86850300 | 1.93135000  | C                                            | 0.80099000  | 3.96496600           | -0.60471100 |
| C | -3.85166600 | -1.10323400 | -0.40119500 | C                                            | -1.59916200 | 3.78618800           | -0.54129900 |
| C | -4.10661900 | -1.80950500 | 2.30036100  | C                                            | -0.45101400 | 4.56779500           | -0.71930400 |
| C | -4.79613100 | -2.04682300 | 0.01280900  | H                                            | 1.69860300  | 4.56154600           | -0.70873400 |
| C | -4.92951500 | -2.40082900 | 1.34654200  | H                                            | -2.58018500 | 4.24073400           | -0.60351600 |
| H | -4.19884000 | -2.08258600 | 3.34509100  | H                                            | -0.53430800 | 5.62538700           | -0.92581100 |
| H | -5.42851000 | -2.50876400 | -0.73714700 | N                                            | -0.23939700 | 1.82439500           | -0.19071600 |
| H | -5.66700200 | -3.13556800 | 1.64409600  | C                                            | 2.08688900  | 1.86073800           | -0.07497400 |
| C | -3.72227200 | -0.79791400 | -1.87307200 | C                                            | 3.40777800  | 2.55004300           | 0.15089700  |



|   |             |             |             |                                              |             |             |                      |
|---|-------------|-------------|-------------|----------------------------------------------|-------------|-------------|----------------------|
| C | 3.93853300  | 3.13054100  | 1.12051800  | H                                            | -1.95686200 | -0.26082000 | 2.65779800           |
| H | 4.12965000  | 2.22893200  | 1.70239700  | H                                            | -3.46516000 | 0.62337000  | 2.73481700           |
| H | 4.87686700  | 3.67992500  | 1.02776800  | H                                            | -3.33270200 | -0.93151100 | 3.56665700           |
| H | 3.22418000  | 3.74728900  | 1.66793400  | C                                            | -0.11635200 | -1.91922700 | -0.82812100          |
| C | 2.98756900  | -0.04611100 | -0.07450300 | H                                            | -1.03419700 | -2.34705800 | -1.22854000          |
| C | 3.49501000  | -0.50711100 | 1.15022600  | H                                            | 0.05910900  | -0.96783300 | -1.39203400          |
| C | 4.58961400  | -1.37684700 | 1.13869000  | C                                            | 1.05277900  | -2.92919300 | -0.82154700          |
| C | 5.16528900  | -1.79228700 | -0.05393100 | H                                            | 2.00251600  | -2.39389500 | -0.75838800          |
| C | 4.65145100  | -1.33035500 | -1.26264600 | C                                            | 1.10020100  | -3.98148900 | -1.91197600          |
| C | 3.56693700  | -0.45725400 | -1.29050800 | H                                            | 1.31603700  | -3.53077800 | -2.88336900          |
| H | 4.98706400  | -1.72931500 | 2.08464100  | H                                            | 1.87822400  | -4.71908100 | -1.70419200          |
| H | 6.01064700  | -2.46883300 | -0.04447400 | H                                            | 0.14399100  | -4.50625600 | -1.98374100          |
| H | 5.09414900  | -1.65098400 | -2.19893400 | C                                            | 0.61559600  | -3.34126800 | 0.60088300           |
| C | 2.87263600  | -0.10286800 | 2.46518900  | H                                            | -0.13781800 | -4.13210100 | 0.52092500           |
| H | 2.27353200  | -0.92052200 | 2.87770000  | C                                            | -0.14969200 | -1.99599900 | 0.72764000           |
| H | 3.64668100  | 0.13088800  | 3.19862400  | H                                            | -1.12881700 | -2.02956800 | 1.19606900           |
| H | 2.22088400  | 0.76131900  | 2.34840500  | H                                            | 0.48564400  | -1.23681100 | 1.23572000           |
| C | 2.99561200  | 0.02830000  | -2.59650900 | C                                            | 1.66645600  | -3.71771300 | 1.62618000           |
| H | 3.10028300  | 1.11062900  | -2.70120900 | H                                            | 2.12699600  | -4.67398100 | 1.36791900           |
| H | 3.49853600  | -0.44998500 | -3.43688400 | H                                            | 2.45566000  | -2.96569200 | 1.65963100           |
| H | 1.92576100  | -0.18512800 | -2.65471800 | H                                            | 1.22753800  | -3.81424700 | 2.62201200           |
| C | -2.58385000 | 1.64898500  | 0.12523300  | Zero-point correction=                       |             |             | 0.698449 Hartree     |
| C | -4.04109500 | 2.03000500  | 0.18342200  | Sum of electronic and thermal Free Energies= |             |             | -1570.745048 Hartree |
| H | -4.60582300 | 1.23930700  | 0.67891500  | Number of imaginary frequencies=             |             |             | 0                    |
| H | -4.14290500 | 2.92872400  | 0.79439900  |                                              |             |             |                      |
| C | -4.63404000 | 2.28327600  | -1.20957100 | <b>1Pa</b>                                   |             |             |                      |
| H | -4.60665300 | 1.37191500  | -1.80590700 | 0.1                                          |             |             |                      |
| H | -5.67230100 | 2.61000800  | -1.13238000 | C                                            | 0.76571200  | 1.35476600  | 0.10663100           |
| H | -4.06331800 | 3.05042800  | -1.73448500 | H                                            | 1.29413900  | 1.55071000  | -0.82957500          |
| N | -2.14358900 | 0.39429700  | 0.09142000  | H                                            | 1.17894400  | 1.99143600  | 0.88875700           |
| C | -3.08553000 | -0.66490600 | 0.16360600  | C                                            | 0.67982300  | -0.16697700 | 0.37126800           |
| C | -3.51868800 | -1.09764900 | 1.43299200  | H                                            | 0.49724300  | -0.34130800 | 1.43731000           |
| C | -3.51922600 | -1.31858500 | -0.99988700 | C                                            | 1.78966400  | -1.07055100 | -0.13263800          |
| C | -4.38455200 | -2.18430800 | 1.51838000  | H                                            | 2.72296500  | -0.89276200 | 0.40600900           |
| C | -4.38763200 | -2.40666400 | -0.87341700 | H                                            | 1.52617700  | -2.12399400 | -0.01152700          |
| C | -4.82038700 | -2.84150400 | 0.37088000  | H                                            | 1.97307900  | -0.88809200 | -1.19448600          |
| H | -4.71709300 | -2.51723200 | 2.49502800  | C                                            | -0.67979700 | -0.16697000 | -0.37119400          |
| H | -4.72547600 | -2.91169900 | -1.77206500 | H                                            | -0.49709100 | -0.34143100 | -1.43720900          |
| H | -5.49293300 | -3.68649400 | 0.44948300  | C                                            | -0.76562700 | 1.35476500  | -0.10670100          |
| C | -3.07892600 | -0.87416800 | -2.37500300 | H                                            | -1.17889300 | 1.99154800  | -0.88868200          |
| H | -2.35764000 | -0.06029600 | -2.31537800 | H                                            | -1.29391000 | 1.55059500  | 0.82964400           |
| H | -2.62695600 | -1.70395600 | -2.92369900 | C                                            | -1.78977700 | -1.07042300 | 0.13261900           |
| H | -3.93526200 | -0.53382300 | -2.96164600 | H                                            | -1.52647700 | -2.12389000 | 0.01133300           |
| C | -3.04257300 | -0.38259900 | 2.67083400  | H                                            | -1.97311800 | -0.88809200 | 1.19450200           |

|                                              |             |             |             |   |            |             |            |
|----------------------------------------------|-------------|-------------|-------------|---|------------|-------------|------------|
| H                                            | -2.72304900 | -0.89237100 | -0.40598700 | C | 2.12827000 | 0.02836600  | 2.69995900 |
| Zero-point correction=                       |             | 0.169486    | Hartree     | H | 1.09815000 | -0.22043000 | 2.43708600 |
| Sum of electronic and thermal Free Energies= |             | -235.677071 | Hartree     | H | 2.30582600 | -0.22068400 | 3.74602900 |
| Number of imaginary frequencies=             |             | 0           |             | H | 2.22274100 | 1.10986700  | 2.57776700 |

## N<sub>2</sub>

|                                              |            |             |             |   |             |             |             |
|----------------------------------------------|------------|-------------|-------------|---|-------------|-------------|-------------|
| 0 1                                          |            |             |             | C | 3.97931300  | -1.04435000 | -1.92052200 |
| N                                            | 0.00000000 | 0.00000000  | 0.54839600  | H | 4.94871900  | -0.64936900 | -2.23449400 |
| N                                            | 0.00000000 | 0.00000000  | -0.54839600 | H | 3.84200900  | -2.00483400 | -2.42195900 |
| Zero-point correction=                       |            | 0.005821    | Hartree     | H | 3.20338300  | -0.36798200 | -2.26895600 |
| Sum of electronic and thermal Free Energies= |            | -109.526962 | Hartree     | C | -2.21921600 | 1.72697800  | 0.29365200  |
| Number of imaginary frequencies=             |            | 0           |             | C | -3.56435500 | 2.30979500  | 0.65254100  |

## 1TSe

|     |             |             |             |   |             |             |             |
|-----|-------------|-------------|-------------|---|-------------|-------------|-------------|
| 0 1 |             |             |             | H | -4.80172700 | 1.80274200  | -1.06370500 |
| Fe  | -0.11593800 | -0.07569700 | -0.30207900 | H | -5.32442400 | 3.25021100  | -0.20258900 |
| N   | 2.00080800  | 0.30117900  | -0.07931000 | H | -3.89991300 | 3.30835100  | -1.25337700 |
| C   | 1.19149600  | 2.41065200  | -0.57903200 | N | -1.90952700 | 0.42100600  | 0.34472300  |
| C   | -1.12353500 | 2.52726400  | -0.08977500 | C | -2.98334700 | -0.49186500 | 0.55345000  |
| C   | 1.26068000  | 3.78202200  | -0.72968900 | C | -3.19161000 | -1.00186600 | 1.84506300  |
| C   | -1.08288000 | 3.92359600  | -0.21035300 | C | -3.79313400 | -0.88943400 | -0.52244000 |
| C   | 0.09445300  | 4.55321600  | -0.56874900 | C | -4.19974300 | -1.94409900 | 2.03950500  |
| H   | 2.20950700  | 4.26556100  | -0.91965000 | C | -4.80303700 | -1.82405900 | -0.28434600 |
| H   | -1.97641400 | 4.50214800  | -0.01197800 | C | -5.00273100 | -2.35894100 | 0.98126700  |
| H   | 0.13471100  | 5.62900700  | -0.67069300 | H | -4.36019900 | -2.34597200 | 3.03348000  |
| N   | 0.00001900  | 1.77455400  | -0.35797200 | H | -5.43044800 | -2.13864600 | -1.11125600 |
| C   | 2.32409300  | 1.52501000  | -0.41655500 | H | -5.78499800 | -3.08936500 | 1.14621700  |
| C   | 3.73180700  | 2.06539700  | -0.47862900 | C | -3.57215800 | -0.37741900 | -1.92640900 |
| H   | 4.41478000  | 1.27887100  | -0.79357600 | H | -4.52975200 | -0.18087800 | -2.41238100 |
| H   | 3.77052700  | 2.84496500  | -1.24082200 | H | -2.97423500 | 0.53191600  | -1.94192600 |
| C   | 4.19940600  | 2.62918500  | 0.87144900  | H | -3.05010000 | -1.12230800 | -2.53260000 |
| H   | 4.28105200  | 1.83023800  | 1.60856700  | C | -2.36055500 | -0.49900200 | 2.99544100  |
| H   | 5.17933300  | 3.09686400  | 0.76753600  | H | -1.29882200 | -0.53439100 | 2.75007500  |
| H   | 3.49539100  | 3.37492900  | 1.24345000  | H | -2.59752800 | 0.54564900  | 3.21426400  |
| C   | 3.04063600  | -0.54743000 | 0.41150000  | H | -2.54784700 | -1.08828000 | 3.89309900  |
| C   | 3.09587400  | -0.70937900 | 1.81244800  | C | 0.38215100  | -0.53248600 | -2.18767300 |
| C   | 4.05439900  | -1.55817300 | 2.35672200  | H | -0.43557300 | -0.46271700 | -2.91069400 |
| C   | 4.95061800  | -2.24220400 | 1.54076800  | H | 1.21286200  | 0.07833100  | -2.54109800 |
| C   | 4.89428600  | -2.06425900 | 0.16802200  | C | 0.69770200  | -2.00029500 | -1.86403100 |
| C   | 3.94936200  | -1.21775600 | -0.42056900 | H | 1.69998000  | -2.07235100 | -1.43928600 |
| H   | 4.09422100  | -1.68261700 | 3.43261300  | C | 0.59824200  | -2.96273000 | -3.04530900 |
| H   | 5.68869700  | -2.90421100 | 1.97579200  | H | 1.34010400  | -2.68685600 | -3.79782200 |
| H   | 5.59551900  | -2.58337600 | -0.47627000 | H | 0.78230800  | -3.99860700 | -2.75049800 |



|                                              |             |              |             |   |             |             |             |
|----------------------------------------------|-------------|--------------|-------------|---|-------------|-------------|-------------|
| H                                            | -1.07080200 | -0.91802100  | -1.04627000 | H | 2.99990700  | -0.12334700 | 3.66092300  |
| C                                            | 0.14016500  | -2.03430900  | 0.60860600  | H | 2.62328900  | 1.16261600  | 2.49898000  |
| H                                            | -0.53523600 | -2.28538000  | 1.41868900  | C | 3.62920100  | -0.89787600 | -2.20244000 |
| H                                            | 1.19197200  | -1.97722900  | 0.84338500  | H | 4.49749000  | -0.41079400 | -2.65327200 |
| C                                            | -1.49615400 | -3.14000800  | -0.94204900 | H | 3.47811800  | -1.84374100 | -2.72886200 |
| H                                            | -2.04209000 | -2.88645400  | -1.84970900 | H | 2.76220700  | -0.26049400 | -2.36627800 |
| H                                            | -1.13513300 | -4.16663100  | -1.04823500 | C | -2.31066200 | 1.76928700  | 0.03800700  |
| H                                            | -2.18124100 | -3.10203700  | -0.09646700 | C | -3.68796800 | 2.35339000  | 0.24139400  |
| Zero-point correction=                       |             | 0.695471     | Hartree     | H | -4.29516300 | 1.65433200  | 0.81803000  |
| Sum of electronic and thermal Free Energies= |             | -1570.671599 | Hartree     | H | -3.58938500 | 3.25910300  | 0.84329000  |
| Number of imaginary frequencies=             |             | 1            |             | C | -4.41103500 | 2.69393300  | -1.06969000 |

## 1HMe

|     |             |             |             |   |             |             |             |
|-----|-------------|-------------|-------------|---|-------------|-------------|-------------|
| O 1 |             |             |             | H | -4.60560400 | 1.79344400  | -1.64997800 |
| Fe  | -0.03649100 | 0.03712000  | -0.12114600 | H | -5.36717900 | 3.17814600  | -0.86365000 |
| N   | 2.02943400  | 0.39783400  | -0.09244800 | H | -3.80637900 | 3.36470100  | -1.68142700 |
| C   | 1.20437400  | 2.53477000  | -0.41919100 | N | -2.02710600 | 0.46601900  | 0.09855400  |
| C   | -1.17807500 | 2.59104800  | -0.17839700 | C | -3.08151500 | -0.42589000 | 0.42603600  |
| C   | 1.22231600  | 3.91273900  | -0.59299800 | C | -3.28550600 | -0.74095800 | 1.78420300  |
| C   | -1.16763400 | 3.96932800  | -0.32219900 | C | -3.88287500 | -1.00576700 | -0.56739800 |
| C   | 0.03672900  | 4.64842300  | -0.53305300 | C | -4.26771400 | -1.66790200 | 2.12298100  |
| H   | 2.16427200  | 4.42056500  | -0.75801000 | C | -4.86851900 | -1.92102700 | -0.18888400 |
| H   | -2.10026600 | 4.51858300  | -0.27894500 | C | -5.05767700 | -2.26334000 | 1.14209100  |
| H   | 0.04919200  | 5.72253800  | -0.65230700 | H | -4.42039400 | -1.91592600 | 3.16734500  |
| N   | 0.00804600  | 1.86172800  | -0.18357200 | H | -5.48562200 | -2.37288800 | -0.95829600 |
| C   | 2.32763500  | 1.67577700  | -0.34737300 | H | -5.82032900 | -2.98080800 | 1.41828400  |
| C   | 3.73477200  | 2.20733600  | -0.48221100 | C | -3.68373800 | -0.70275600 | -2.03267600 |
| H   | 4.37919600  | 1.43244300  | -0.89823700 | H | -2.93523800 | 0.07341400  | -2.18127300 |
| H   | 3.71868500  | 3.02302600  | -1.20659600 | H | -3.36473600 | -1.59992900 | -2.57146900 |
| C   | 4.34093500  | 2.71157700  | 0.83546500  | H | -4.62060000 | -0.37865300 | -2.49059500 |
| H   | 4.53347200  | 1.88172400  | 1.51508700  | C | -2.47440800 | -0.04678800 | 2.84666800  |
| H   | 5.28838400  | 3.21953300  | 0.64747400  | H | -1.41189600 | -0.05325600 | 2.59681400  |
| H   | 3.66189800  | 3.41240800  | 1.32413300  | H | -2.76508700 | 1.00454900  | 2.92666000  |
| C   | 3.10961300  | -0.46097100 | 0.24804500  | H | -2.62735200 | -0.51763200 | 3.81798600  |
| C   | 3.38647300  | -0.65577700 | 1.61816100  | C | 0.05943500  | -1.38776100 | -2.35606000 |
| C   | 4.39554000  | -1.54399700 | 1.98348100  | H | 0.68165300  | -1.32586200 | -3.25088900 |
| C   | 5.13017700  | -2.23066200 | 1.02122700  | H | -0.95943200 | -1.62641500 | -2.65968600 |
| C   | 4.86246300  | -2.01899900 | -0.32332000 | C | 0.61729800  | -2.44890800 | -1.39558400 |
| C   | 3.86062700  | -1.13388500 | -0.72922000 | H | 1.62474900  | -2.15703700 | -1.09925900 |
| H   | 4.60655700  | -1.69522600 | 3.03596500  | C | 0.69326200  | -3.80575800 | -2.10032700 |
| H   | 5.90981600  | -2.91980400 | 1.32065100  | H | 1.38708100  | -3.74747600 | -2.94151000 |
| H   | 5.43923200  | -2.53869800 | -1.08094300 | H | 1.04722500  | -4.58073200 | -1.41854200 |
| C   | 2.59808000  | 0.08544600  | 2.66916900  | H | -0.28087600 | -4.10692700 | -2.49111300 |
| H   | 1.54301600  | -0.19623700 | 2.64979100  | C | -0.23578400 | -2.48598500 | -0.14165300 |
|     |             |             |             | H | 0.04910700  | -0.34288300 | -1.97924600 |
|     |             |             |             | C | 0.23554300  | -2.04342200 | 1.04239500  |

|                                              |             |             |                      |   |             |             |             |
|----------------------------------------------|-------------|-------------|----------------------|---|-------------|-------------|-------------|
| H                                            | -0.39028200 | -2.09391000 | 1.92636300           | H | -2.14800100 | 4.51038500  | -0.84768500 |
| H                                            | 1.27682600  | -1.78382600 | 1.16843000           | H | 0.00000700  | 5.69674100  | -1.23302500 |
| C                                            | -1.56849400 | -3.17592800 | -0.24625600          | N | -0.00000400 | 1.96067000  | -0.21703000 |
| H                                            | -2.12100700 | -2.88833600 | -1.13960300          | C | 2.32347200  | 1.82580400  | -0.05620500 |
| H                                            | -1.38316700 | -4.25245700 | -0.31084600          | C | 3.73926600  | 2.33759400  | -0.05890400 |
| H                                            | -2.19245400 | -2.98418200 | 0.62433600           | H | 3.81146300  | 3.27875900  | -0.60126100 |
| Zero-point correction=                       |             |             | 0.697349 Hartree     | H | 4.11487800  | 2.49704300  | 0.95603300  |
| Sum of electronic and thermal Free Energies= |             |             | -1570.748317 Hartree | C | 3.04414200  | -0.27149800 | 0.74008200  |
| Number of imaginary frequencies=             |             |             | 0                    | C | 3.43692400  | -0.02125800 | 2.06342800  |

## 1Pe

|                                              |             |            |                     |   |             |             |             |
|----------------------------------------------|-------------|------------|---------------------|---|-------------|-------------|-------------|
| 0 1                                          |             |            |                     | C | 4.42007700  | -0.76483600 | 2.69647800  |
| C                                            | 2.36938000  | 3.62010200 | -0.69971100         | C | 5.03407800  | -1.79844700 | 2.00102600  |
| H                                            | 2.63387800  | 3.51546900 | 0.35612900          | C | 4.64509300  | -2.06351400 | 0.69281200  |
| H                                            | 3.09365800  | 4.29697500 | -1.15988900         | C | 3.65687100  | -1.32875100 | 0.02393800  |
| C                                            | 0.95806600  | 4.17960500 | -0.85062800         | H | 4.69163700  | -0.54591400 | 3.72273100  |
| H                                            | 0.75001400  | 4.29555900 | -1.92306900         | H | 5.80362900  | -2.40226700 | 2.46747700  |
| C                                            | 0.87553000  | 5.57308700 | -0.20886300         | H | 5.13890800  | -2.87584200 | 0.17879100  |
| H                                            | 1.66015500  | 6.22145200 | -0.60638300         | C | 3.28215400  | -1.68467600 | -1.42310800 |
| H                                            | -0.08568900 | 6.05469500 | -0.39302700         | C | -2.32347700 | 1.82581200  | -0.05621200 |
| H                                            | 1.01600200  | 5.49274600 | 0.87249000          | N | -2.01574600 | 0.55328000  | 0.22844800  |
| C                                            | 0.13213700  | 2.08126100 | 0.24743800          | C | -3.04412500 | -0.27150200 | 0.74008800  |
| H                                            | -0.68357400 | 1.44508100 | 0.57819900          | C | -3.43690600 | -0.02124900 | 2.06343400  |
| H                                            | 1.13669900  | 1.69011600 | 0.34709900          | C | -3.65684300 | -1.32876500 | 0.02395600  |
| C                                            | -0.12402100 | 3.26643200 | -0.31035500         | C | -4.42004700 | -0.76483100 | 2.69649500  |
| C                                            | -1.54360300 | 3.74280900 | -0.48457800         | H | -2.91161500 | 0.77034400  | 2.58435200  |
| H                                            | -1.76370600 | 4.60225200 | 0.15625800          | C | -4.64505000 | -2.06353800 | 0.69284600  |
| H                                            | -1.71564600 | 4.05581100 | -1.51923400         | C | -5.03403300 | -1.79846200 | 2.00105700  |
| H                                            | -2.25152000 | 2.94948100 | -0.25070800         | H | -4.69160900 | -0.54589900 | 3.72274500  |
| H                                            | 2.46987400  | 2.64194600 | -1.17049400         | H | -5.13885300 | -2.87588200 | 0.17883800  |
| Zero-point correction=                       |             |            | 0.167722 Hartree    | H | -5.80357200 | -2.40228900 | 2.46751800  |
| Sum of electronic and thermal Free Energies= |             |            | -235.683664 Hartree | C | -0.00000900 | -1.03009000 | 1.97772700  |
| Number of imaginary frequencies=             |             |            | 0                   | H | 0.89221400  | -1.03036100 | 2.61167200  |

## [Fe2]

|      |             |            |             |   |            |             |             |
|------|-------------|------------|-------------|---|------------|-------------|-------------|
| -1 1 |             |            |             | H | 2.91162500 | 0.77032100  | 2.58436000  |
| Fe   | -0.00001600 | 0.22621200 | 0.42081200  | C | 4.13933200 | -2.83190400 | -1.97623400 |
| N    | 2.01576000  | 0.55327400 | 0.22844800  | H | 3.99639900 | -3.75505800 | -1.40997300 |
| C    | 1.20552800  | 2.64634600 | -0.35140400 | H | 3.83612200 | -3.02435300 | -3.00808500 |
| C    | -1.20553500 | 2.64635100 | -0.35141700 | H | 5.20341900 | -2.58177500 | -1.97944800 |
| C    | 1.21112600  | 3.97924000 | -0.73074300 | C | 1.81525100 | -2.13476600 | -1.48873200 |
| C    | -1.21111800 | 3.97924500 | -0.73075900 | H | 1.15575900 | -1.31464600 | -1.21185000 |
| C    | 0.00000600  | 4.65457000 | -0.94072200 | H | 1.56794500 | -2.45032200 | -2.50784100 |
| H    | 2.14801600  | 4.51037500 | -0.84763600 | H | 1.63504400 | -2.97034700 | -0.80838700 |
|      |             |            |             | C | 3.48557400 | -0.47981300 | -2.35744000 |
|      |             |            |             | H | 2.84083500 | 0.35016300  | -2.07660400 |

|                                              |             |              |             |   |             |             |             |
|----------------------------------------------|-------------|--------------|-------------|---|-------------|-------------|-------------|
| H                                            | 4.52784900  | -0.14862900  | -2.33449100 | C | -5.09945900 | -2.24088000 | -1.32335100 |
| H                                            | 3.24392600  | -0.77218200  | -3.38401700 | C | -4.73778600 | -2.02540300 | -0.00259100 |
| C                                            | -3.73927500 | 2.33758100   | -0.05892000 | C | -3.73691100 | -1.11951700 | 0.39022300  |
| H                                            | -3.81145800 | 3.27881200   | -0.60116500 | H | -4.70246400 | -1.68514600 | -3.37133500 |
| H                                            | -4.11493800 | 2.49690200   | 0.95601700  | H | -5.87926700 | -2.95452200 | -1.56179600 |
| H                                            | -4.40664500 | 1.61340400   | -0.53148200 | H | -5.25868400 | -2.58800400 | 0.76308400  |
| H                                            | 4.40666400  | 1.61337000   | -0.53135200 | C | -3.48181400 | -1.01146500 | 1.91017900  |
| C                                            | -3.28215900 | -1.68467600  | -1.42310400 | C | 2.30253000  | 1.84704700  | -0.17002600 |
| C                                            | -4.13931900 | -2.83192800  | -1.97621000 | N | 2.02870500  | 0.56732600  | -0.40287300 |
| H                                            | -5.20341500 | -2.58183700  | -1.97939100 | C | 3.11965300  | -0.31597200 | -0.54768000 |
| H                                            | -3.83613400 | -3.02436000  | -3.00807200 | C | 3.64535700  | -0.43694600 | -1.84652400 |
| H                                            | -3.99633400 | -3.75507800  | -1.40995700 | C | 3.67350600  | -1.08731300 | 0.49896500  |
| C                                            | -3.48565900 | -0.47981100  | -2.35741700 | C | 4.67937600  | -1.30493800 | -2.14857400 |
| H                                            | -4.52794700 | -0.14867200  | -2.33442700 | H | 3.17516300  | 0.16562500  | -2.61401200 |
| H                                            | -2.84094000 | 0.35018900   | -2.07660200 | C | 4.71174700  | -1.96973200 | 0.15236800  |
| H                                            | -3.24403700 | -0.77216000  | -3.38400700 | C | 5.21530000  | -2.09225100 | -1.13348800 |
| C                                            | -1.81524600 | -2.13471800  | -1.48880700 | H | 5.05133900  | -1.37702500 | -3.16393400 |
| H                                            | -1.15576500 | -1.31458600  | -1.21193200 | H | 5.15258800  | -2.58279400 | 0.92941200  |
| H                                            | -1.63497500 | -2.97031100  | -0.80849400 | H | 6.01766400  | -2.79154500 | -1.33676100 |
| H                                            | -1.56798500 | -2.45023800  | -2.50793800 | H | -2.90254700 | -0.07879400 | -2.72825600 |
| Zero-point correction=                       |             | 0.617712     | Hartree     | C | -4.78928400 | -0.58913300 | 2.60968500  |
| Sum of electronic and thermal Free Energies= |             | -1453.525307 | Hartree     | H | -5.59564700 | -1.30634500 | 2.44786900  |
| Number of imaginary frequencies=             |             | 0            |             | H | -4.61727700 | -0.51061700 | 3.68703400  |
|                                              |             |              |             | H | -5.12439100 | 0.38440700  | 2.24661600  |
| <b>2PC</b>                                   |             |              |             | C | -3.07264800 | -2.39674900 | 2.44982900  |
| -1 1                                         |             |              |             | H | -2.13619100 | -2.72553300 | 1.99745400  |
| Fe                                           | -0.00516600 | 0.21460000   | -0.73461800 | H | -2.92927900 | -2.33875400 | 3.53258800  |
| N                                            | -2.03199000 | 0.51063700   | -0.44593900 | H | -3.82991500 | -3.15637500 | 2.24963800  |
| C                                            | -1.23613400 | 2.63790200   | -0.01607100 | C | -2.39628100 | -0.01835400 | 2.35354500  |
| C                                            | 1.15565200  | 2.66992800   | 0.01750900  | H | -1.43204700 | -0.21583700 | 1.88844700  |
| C                                            | -1.26638000 | 3.99665700   | 0.26865000  | H | -2.65735800 | 1.01410600  | 2.12283500  |
| C                                            | 1.14637900  | 4.02633400   | 0.30112500  | H | -2.29219900 | -0.10492500 | 3.44008800  |
| C                                            | -0.07318100 | 4.70099400   | 0.45637600  | C | 3.71268600  | 2.35742500  | -0.04221900 |
| H                                            | -2.21238900 | 4.51982000   | 0.33669700  | H | 3.73402700  | 3.42271900  | 0.17447900  |
| H                                            | 2.07551400  | 4.57563100   | 0.38849200  | H | 4.27597900  | 2.17977900  | -0.96157600 |
| H                                            | -0.08972600 | 5.75998200   | 0.67888000  | H | 4.24553200  | 1.83285400  | 0.75654000  |
| N                                            | -0.02768100 | 1.95083300   | -0.06286100 | H | -4.32450000 | 1.80650300  | 0.63565800  |
| C                                            | -2.35067200 | 1.78855700   | -0.23954300 | C | 3.30111600  | -1.03792900 | 1.99804000  |
| C                                            | -3.77773200 | 2.26312700   | -0.19523400 | C | 4.55115400  | -0.61412600 | 2.79590200  |
| H                                            | -3.83450400 | 3.34407200   | -0.08894200 | H | 4.89343300  | 0.37289600  | 2.47831700  |
| H                                            | -4.30380400 | 1.97898800   | -1.10979700 | H | 4.30512600  | -0.56395500 | 3.86049100  |
| C                                            | -3.08279900 | -0.40889600  | -0.64103800 | H | 5.37814900  | -1.31532800 | 2.67140000  |
| C                                            | -3.45208100 | -0.63749100  | -1.97966300 | C | 2.17232600  | -0.07264500 | 2.38874000  |
| C                                            | -4.44593400 | -1.53453500  | -2.32916800 | H | 2.43301600  | 0.96895900  | 2.20111300  |

|                                              |             |             |                       |   |             |             |             |
|----------------------------------------------|-------------|-------------|-----------------------|---|-------------|-------------|-------------|
| H                                            | 1.24841900  | -0.27594200 | 1.84989900            | C | -4.79372600 | -1.92268400 | -0.08210000 |
| H                                            | 1.99386500  | -0.18772400 | 3.46295900            | C | -3.79672000 | -1.00678400 | 0.29390300  |
| C                                            | 2.87769700  | -2.44095300 | 2.47563700            | H | -4.31182900 | -2.14586600 | -3.42516300 |
| H                                            | 1.96023100  | -2.75744800 | 1.97865200            | H | -5.78914900 | -3.04546400 | -1.61435400 |
| H                                            | 3.64521200  | -3.19312900 | 2.28696100            | H | -5.43009500 | -2.34179100 | 0.68821200  |
| H                                            | 2.68928200  | -2.41451900 | 3.55272200            | C | -3.66911200 | -0.73971700 | 1.81296100  |
| C                                            | 0.01187200  | -1.83893100 | -0.21163100           | C | 2.30112100  | 1.98063600  | -0.12421100 |
| H                                            | 0.98632200  | -2.09171800 | 0.19111300            | N | 2.07326900  | 0.69090800  | -0.38397000 |
| H                                            | -0.83042300 | -1.89263900 | 0.46656000            | C | 3.19459600  | -0.15542500 | -0.51294800 |
| C                                            | -0.16675000 | -1.80636800 | -1.57326800           | C | 3.79361700  | -0.20498800 | -1.78376200 |
| H                                            | -1.17751800 | -1.78776300 | -1.96373100           | C | 3.70094000  | -0.96744700 | 0.52477000  |
| C                                            | 0.89024600  | -2.26166100 | -2.54244900           | C | 4.85288900  | -1.04827000 | -2.07057600 |
| H                                            | 0.97083600  | -1.58602600 | -3.39569000           | H | 3.37037600  | 0.43809700  | -2.54550800 |
| H                                            | 1.86374400  | -2.32213000 | -2.05637000           | C | 4.76938600  | -1.81901500 | 0.19622000  |
| H                                            | 0.64299600  | -3.25872300 | -2.92591200           | C | 5.34323300  | -1.87584800 | -1.06545600 |
| C                                            | -0.03022700 | 0.70567700  | -2.68047300           | H | 5.28032700  | -1.06857100 | -3.06631300 |
| H                                            | -0.42172300 | 1.73194600  | -2.71108300           | H | 5.16230000  | -2.47693000 | 0.96171600  |
| H                                            | 0.98297700  | 0.73620400  | -3.10449600           | H | 6.16127300  | -2.55978600 | -1.25813400 |
| H                                            | -0.64160900 | 0.09882100  | -3.36323100           | H | -2.53761000 | -0.50790200 | -2.81660800 |
| Zero-point correction=                       |             |             | 0.703153 Hartree      | C | -4.99899800 | -0.18058400 | 2.35545200  |
| Sum of electronic and thermal Free Energies= |             |             | -1571.9793527 Hartree | H | -5.82769400 | -0.87503200 | 2.20563000  |
| Number of imaginary frequencies=             |             |             | 0                     | H | -4.90337200 | 0.00400600  | 3.42935800  |
|                                              |             |             |                       | H | -5.25785400 | 0.76221700  | 1.87147700  |
|                                              |             |             |                       | C | -3.39437500 | -2.07804700 | 2.53256900  |
|                                              |             |             |                       | H | -2.42740700 | -2.48486800 | 2.23574000  |
|                                              |             |             |                       | H | -3.37600900 | -1.90894500 | 3.61311200  |
|                                              |             |             |                       | H | -4.15934900 | -2.82625300 | 2.32072400  |
|                                              |             |             |                       | C | -2.54922000 | 0.21990000  | 2.24415000  |
|                                              |             |             |                       | H | -1.57681400 | -0.08564700 | 1.85902600  |
|                                              |             |             |                       | H | -2.72025200 | 1.24486900  | 1.91677400  |
|                                              |             |             |                       | H | -2.51336900 | 0.21819100  | 3.33834400  |
|                                              |             |             |                       | C | 3.68792900  | 2.52137500  | 0.09292400  |
|                                              |             |             |                       | H | 3.66516500  | 3.57708300  | 0.35377400  |
|                                              |             |             |                       | H | 4.30637800  | 2.39820500  | -0.79974200 |
|                                              |             |             |                       | H | 4.19278900  | 1.97825400  | 0.89862000  |
|                                              |             |             |                       | H | -4.34891800 | 1.89398800  | 0.34227100  |
|                                              |             |             |                       | C | 3.18136600  | -1.05684000 | 1.97405300  |
|                                              |             |             |                       | C | 4.35923700  | -0.84585900 | 2.94615200  |
|                                              |             |             |                       | H | 4.80765500  | 0.13905200  | 2.79414200  |
|                                              |             |             |                       | H | 3.99265500  | -0.89957600 | 3.97486400  |
|                                              |             |             |                       | H | 5.14245500  | -1.59657800 | 2.83270400  |
|                                              |             |             |                       | C | 2.09803400  | -0.04531700 | 2.37440600  |
|                                              |             |             |                       | H | 2.43660900  | 0.98726900  | 2.27976400  |
|                                              |             |             |                       | H | 1.19650500  | -0.15507400 | 1.77455500  |

## 2TSe1

-1 1

|    |             |             |             |   |             |             |             |
|----|-------------|-------------|-------------|---|-------------|-------------|-------------|
| Fe | 0.09367800  | 0.23292900  | -0.72424700 | H | -3.37600900 | -1.90894500 | 3.61311200  |
| N  | -1.96636800 | 0.47427300  | -0.57056700 | H | -4.15934900 | -2.82625300 | 2.32072400  |
| C  | -1.26259600 | 2.64788700  | -0.17896400 | C | -2.54922000 | 0.21990000  | 2.24415000  |
| C  | 1.12513900  | 2.76386400  | 0.00732000  | H | -1.57681400 | -0.08564700 | 1.85902600  |
| C  | -1.35773000 | 4.00712300  | 0.08305100  | H | -2.72025200 | 1.24486900  | 1.91677400  |
| C  | 1.04841500  | 4.12016200  | 0.28244400  | H | -2.51336900 | 0.21819100  | 3.33834400  |
| C  | -0.20137800 | 4.75243500  | 0.34660700  | C | 3.68792900  | 2.52137500  | 0.09292400  |
| H  | -2.32342300 | 4.49765700  | 0.08523300  | H | 3.66516500  | 3.57708300  | 0.35377400  |
| H  | 1.95042000  | 4.70184900  | 0.42820700  | H | 4.30637800  | 2.39820500  | -0.79974200 |
| H  | -0.26899200 | 5.81121000  | 0.56018700  | H | 4.19278900  | 1.97825400  | 0.89862000  |
| N  | -0.03058300 | 2.00600400  | -0.14231100 | H | -4.34891800 | 1.89398800  | 0.34227100  |
| C  | -2.33199600 | 1.75358600  | -0.44083800 | C | 3.18136600  | -1.05684000 | 1.97405300  |
| C  | -3.76620300 | 2.20016200  | -0.53077600 | C | 4.35923700  | -0.84585900 | 2.94615200  |
| H  | -3.83192400 | 3.28211900  | -0.62322300 | H | 4.80765500  | 0.13905200  | 2.79414200  |
| H  | -4.24635100 | 1.75112600  | -1.40292400 | H | 3.99265500  | -0.89957600 | 3.97486400  |
| C  | -2.99814500 | -0.47491700 | -0.74659900 | H | 5.14245500  | -1.59657800 | 2.83270400  |
| C  | -3.19849100 | -0.91916200 | -2.06435400 | C | 2.09803400  | -0.04531700 | 2.37440600  |
| C  | -4.18461200 | -1.83135000 | -2.39583100 | H | 2.43660900  | 0.98726900  | 2.27976400  |
| C  | -5.00381500 | -2.33345100 | -1.38953100 | H | 1.19650500  | -0.15507400 | 1.77455500  |

|   |             |             |             |   |             |             |             |
|---|-------------|-------------|-------------|---|-------------|-------------|-------------|
| H | 1.84906200  | -0.22546800 | 3.42537100  | C | 3.68351700  | -1.13573800 | -0.00643100 |
| C | 2.58723800  | -2.46159500 | 2.18765200  | H | 4.56386800  | -0.45310900 | 3.75455800  |
| H | 1.72650500  | -2.60286100 | 1.53119200  | H | 5.75724800  | -2.24877700 | 2.48524200  |
| H | 3.31776500  | -3.24726100 | 1.98229500  | H | 5.17366400  | -2.67337200 | 0.16062700  |
| H | 2.25534500  | -2.56632200 | 3.22532200  | C | 3.40165700  | -1.55039700 | -1.46467700 |
| C | -0.57151200 | -2.60159600 | -0.05781500 | C | -2.36546700 | 1.60487300  | -0.70131100 |
| H | -0.45592500 | -3.66436900 | 0.17307100  | N | -2.02068600 | 0.40593700  | -0.14744000 |
| H | -1.40594100 | -2.09672300 | 0.40808100  | C | -3.06197400 | -0.42260200 | 0.31136000  |
| C | 0.26920900  | -1.96394000 | -0.88168800 | C | -3.85516800 | 0.06128800  | 1.36667500  |
| H | 0.09285900  | -0.91811400 | -1.82824900 | C | -3.34110000 | -1.71154500 | -0.21455900 |
| C | 1.37410000  | -2.77728000 | -1.52835300 | C | -4.87966900 | -0.68092900 | 1.93152600  |
| H | 2.35057400  | -2.53308600 | -1.10606700 | H | -3.61136800 | 1.04655400  | 1.74667200  |
| H | 1.20871100  | -3.85325700 | -1.40240600 | C | -4.37335200 | -2.44240900 | 0.38747600  |
| H | 1.44209100  | -2.56341900 | -2.60009500 | C | -5.13705200 | -1.95499300 | 1.44263100  |
| C | 0.12993300  | 0.11169800  | -2.86825300 | H | -5.45793600 | -0.27256300 | 2.75264900  |
| H | -0.45796100 | 1.02531300  | -2.97008400 | H | -4.60701300 | -3.43039700 | 0.01682400  |
| H | 1.15680300  | 0.30531100  | -3.18329900 | H | -5.92358600 | -2.56695400 | 1.86837000  |
| H | -0.29076000 | -0.63335700 | -3.55471200 | H | 2.77554300  | 0.84039300  | 2.59818200  |

Zero-point correction= 0.6975601 Hartree

Sum of electronic and thermal Free Energies= -1571.9328357 Hartree

Number of imaginary frequencies= 1

## 2IMe1

-1 1

|    |             |             |             |   |             |             |             |
|----|-------------|-------------|-------------|---|-------------|-------------|-------------|
| Fe | -0.06555100 | 0.26946900  | 0.33812400  | H | 2.50041800  | -3.26432100 | -2.45174800 |
| N  | 1.96322500  | 0.65578500  | 0.21444700  | H | 3.32586300  | -3.67129900 | -0.93457100 |
| C  | 1.10850600  | 2.59272900  | -0.72727500 | C | 2.51725200  | -0.59787500 | -2.28426400 |
| C  | -1.28472300 | 2.44380200  | -0.96853400 | H | 1.51883400  | -0.48359300 | -1.86573400 |
| C  | 1.12629700  | 3.83968500  | -1.30453600 | H | 2.95899000  | 0.39661000  | -2.36966500 |
| C  | -1.28064300 | 3.71406400  | -1.56707200 | H | 2.42764500  | -1.01232200 | -3.29314200 |
| C  | -0.10070300 | 4.41518000  | -1.73426100 | C | -3.78357300 | 1.94958500  | -1.06842300 |
| H  | 2.05227000  | 4.38493900  | -1.43091800 | H | -3.80456700 | 2.76884400  | -1.78629800 |
| H  | -2.21545400 | 4.15896200  | -1.88785600 | H | -4.39028900 | 2.24023400  | -0.20529700 |
| H  | -0.10740500 | 5.39638000  | -2.19143200 | H | -4.27827800 | 1.08683900  | -1.52278800 |
| N  | -0.06140600 | 1.88967800  | -0.55622800 | H | 4.32683200  | 1.66726300  | -0.76128600 |
| C  | 2.25078000  | 1.85051700  | -0.25023600 | C | -2.59386700 | -2.30077000 | -1.42175800 |
| C  | 3.65483000  | 2.38942800  | -0.29094900 | C | -3.22561800 | -3.61679600 | -1.90182500 |
| H  | 3.70496200  | 3.32448500  | -0.84300400 | H | -4.27749300 | -3.48765700 | -2.16857800 |
| H  | 4.03300200  | 2.55892300  | 0.72034900  | H | -2.68988700 | -3.95419900 | -2.79226300 |
| C  | 3.02021500  | -0.13441200 | 0.72816100  | H | -3.14720500 | -4.40553400 | -1.15010900 |
| C  | 3.35134900  | 0.08893800  | 2.07287400  | C | -2.63139800 | -1.32709400 | -2.61344100 |
| C  | 4.33438900  | -0.64357900 | 2.71305500  | H | -3.66626800 | -1.11956000 | -2.90082600 |
| C  | 4.99529100  | -1.64443400 | 2.00744600  | H | -2.13509600 | -0.38998300 | -2.37098500 |
| C  | 4.66024500  | -1.87560100 | 0.68231900  | H | -2.12460100 | -1.78263200 | -3.47022700 |

|                                              |             |              |             |   |             |             |             |
|----------------------------------------------|-------------|--------------|-------------|---|-------------|-------------|-------------|
| C                                            | -1.13338800 | -2.61185200  | -1.06159700 | H | 4.50226800  | -1.02525400 | 3.66241600  |
| H                                            | -0.58421800 | -1.69082700  | -0.86615100 | H | 5.64251300  | -2.64574600 | 2.13433700  |
| H                                            | -1.07380000 | -3.24183000  | -0.17197400 | H | 5.02745900  | -2.71847200 | -0.22089100 |
| H                                            | -0.64770600 | -3.12530200  | -1.89855300 | C | 3.27771600  | -1.33631400 | -1.64641700 |
| C                                            | 0.50599000  | -1.65864300  | 2.30493100  | C | -2.38920300 | 1.88425800  | -0.32265500 |
| H                                            | 0.40316500  | -2.28212600  | 3.19936900  | N | -2.07805200 | 0.59740200  | 0.02926300  |
| H                                            | 1.14070500  | -2.07715200  | 1.52315900  | C | -3.13717500 | -0.26328200 | 0.35866300  |
| C                                            | -0.09331900 | -0.46110200  | 2.17905900  | C | -3.96808000 | 0.10127400  | 1.43482700  |
| H                                            | -1.15811600 | 2.57918600   | 1.79848200  | C | -3.40527700 | -1.48373900 | -0.31858800 |
| C                                            | -0.87893400 | 0.05279100   | 3.35998100  | C | -5.01700200 | -0.69041000 | 1.87235600  |
| H                                            | -1.91746800 | 0.24605400   | 3.08330000  | H | -3.73574300 | 1.03284900  | 1.93635200  |
| H                                            | -0.87315300 | -0.64362000  | 4.21100000  | C | -4.46412400 | -2.26755300 | 0.15666000  |
| H                                            | -0.46761700 | 1.00899700   | 3.70031500  | C | -5.26566400 | -1.89690200 | 1.23099800  |
| C                                            | -1.52036200 | 3.56237900   | 2.09956200  | H | -5.62201700 | -0.37274900 | 2.71420200  |
| H                                            | -1.04097400 | 4.31260800   | 1.47140300  | H | -4.69031000 | -3.20354700 | -0.33430400 |
| H                                            | -2.59992800 | 3.61189500   | 1.95304400  | H | -6.07218000 | -2.54472200 | 1.55378200  |
| H                                            | -1.28564200 | 3.74496900   | 3.14892800  | H | 2.74040400  | 0.46469800  | 2.72485100  |
| Zero-point correction=                       |             | 0.7007121    | Hartree     | C | 4.59663800  | -1.27913800 | -2.44153600 |
| Sum of electronic and thermal Free Energies= |             | -1571.978926 | Hartree     | H | 5.30406200  | -2.05409800 | -2.14503200 |
| Number of imaginary frequencies=             |             | 0            |             | H | 4.38407000  | -1.41156800 | -3.50580800 |
|                                              |             |              |             | H | 5.08009000  | -0.30836900 | -2.30808500 |
| <b>2IMe2</b>                                 |             |              |             | C | 2.63880200  | -2.72605400 | -1.82325300 |
| -1 1                                         |             |              |             | H | 1.70874600  | -2.78577300 | -1.25573800 |
| Fe                                           | -0.12911800 | 0.33574600   | 0.45711900  | H | 2.41377600  | -2.90349100 | -2.87923000 |
| N                                            | 1.91196500  | 0.65653400   | 0.34949700  | H | 3.30182200  | -3.52033600 | -1.47455600 |
| C                                            | 1.11836400  | 2.74115300   | -0.28515600 | C | 2.33744000  | -0.31024300 | -2.29621900 |
| C                                            | -1.28617000 | 2.72033600   | -0.46875100 | H | 1.35046900  | -0.29247200 | -1.83661500 |
| C                                            | 1.18172800  | 4.04904100   | -0.70078800 | H | 2.74132700  | 0.70233900  | -2.25142800 |
| C                                            | -1.23642500 | 4.05976100   | -0.89914100 | H | 2.22695600  | -0.58136700 | -3.35073900 |
| C                                            | -0.03167000 | 4.72354800   | -1.01522000 | C | -3.79108800 | 2.30676900  | -0.67353100 |
| H                                            | 2.12755900  | 4.56642200   | -0.79007800 | H | -3.77931800 | 3.23864500  | -1.23798100 |
| H                                            | -2.15659600 | 4.58231600   | -1.13363000 | H | -4.43682200 | 2.44767200  | 0.19786700  |
| H                                            | -0.00639800 | 5.75482900   | -1.34386900 | H | -4.26861900 | 1.54211200  | -1.29356300 |
| N                                            | -0.07425200 | 2.07298000   | -0.17432600 | H | 4.29003600  | 1.71203900  | -0.55736100 |
| C                                            | 2.24020100  | 1.89160300   | 0.05157500  | C | -2.60888900 | -1.95091900 | -1.54729100 |
| C                                            | 3.66501600  | 2.37433000   | 0.04716500  | C | -3.26689000 | -3.15983900 | -2.23211400 |
| H                                            | 3.74084400  | 3.38424700   | -0.34741600 | H | -4.29676600 | -2.94418800 | -2.52713300 |
| H                                            | 4.07939900  | 2.36121400   | 1.05827800  | H | -2.69851600 | -3.40037000 | -3.13374800 |
| C                                            | 2.94277500  | -0.23739100  | 0.73102600  | H | -3.26203600 | -4.04622900 | -1.59385800 |
| C                                            | 3.29059300  | -0.21812000  | 2.09064400  | C | -2.51645800 | -0.83853400 | -2.60778100 |
| C                                            | 4.25935700  | -1.05911400  | 2.60722100  | H | -3.51856000 | -0.53674900 | -2.92620200 |
| C                                            | 4.88996300  | -1.96320600  | 1.75764700  | H | -1.99071600 | 0.03170100  | -2.22183900 |
| C                                            | 4.53651600  | -1.99476100  | 0.41794600  | H | -1.98026500 | -1.21797500 | -3.48368500 |
| C                                            | 3.57028900  | -1.14292100  | -0.14522000 | C | -1.19621600 | -2.39131900 | -1.13487700 |

|                                              |             |              |             |   |             |             |             |
|----------------------------------------------|-------------|--------------|-------------|---|-------------|-------------|-------------|
| H                                            | -0.61909600 | -1.54247500  | -0.76607000 | C | -3.20860300 | -0.26039800 | 0.39868800  |
| H                                            | -1.23610400 | -3.14474300  | -0.34587100 | C | -3.91205700 | -0.24521100 | 1.61124100  |
| H                                            | -0.66925400 | -2.80444700  | -2.00155600 | C | -3.65036900 | -1.10763000 | -0.65155100 |
| C                                            | 0.35905700  | -1.70668700  | 2.44330000  | C | -5.01355500 | -1.05485200 | 1.84343500  |
| H                                            | 0.24908600  | -2.25935500  | 3.38213500  | H | -3.54822700 | 0.43048100  | 2.37733700  |
| H                                            | 0.93516900  | -2.21670900  | 1.67086300  | C | -4.76793600 | -1.91111200 | -0.38476100 |
| C                                            | -0.16773700 | -0.48481000  | 2.25381900  | C | -5.44315200 | -1.90212300 | 0.83179000  |
| C                                            | -0.90184100 | 0.15428000   | 3.40744000  | H | -5.52345400 | -1.02460900 | 2.79957800  |
| H                                            | -1.94410100 | 0.33900500   | 3.13833300  | H | -5.13523000 | -2.57786000 | -1.15172300 |
| H                                            | -0.88525700 | -0.45872100  | 4.32056200  | H | -6.29782200 | -2.55239300 | 0.97764500  |
| H                                            | -0.46523900 | 1.13141700   | 3.63969200  | H | 3.28343800  | 0.32387600  | 2.55946100  |
| Zero-point correction=                       |             | 0.652898     | Hartree     | C | 4.30899200  | -0.80944600 | -2.96101500 |
| Sum of electronic and thermal Free Energies= |             | -1531.469091 | Hartree     | H | 5.17188700  | -1.46924000 | -2.85705800 |
| Number of imaginary frequencies=             |             | 0            |             | H | 3.93608800  | -0.90343300 | -3.98453700 |

## 2IMe3

|      |             |             |             |   |             |             |             |
|------|-------------|-------------|-------------|---|-------------|-------------|-------------|
| -1 1 |             |             |             | H | 4.64950700  | 0.21855000  | -2.81732900 |
| Fe   | -0.09616000 | 0.28902700  | 0.75304500  | C | 2.74692700  | -2.62012600 | -2.20324300 |
| N    | 2.03512200  | 0.60621000  | 0.37227200  | H | 1.90570500  | -2.86758400 | -1.55407200 |
| C    | 1.13900500  | 2.63108000  | -0.35615600 | H | 2.43486100  | -2.74585000 | -3.24424100 |
| C    | -1.24684600 | 2.64935800  | -0.36805000 | H | 3.55783200  | -3.32343100 | -2.00461200 |
| C    | 1.19006100  | 3.93773800  | -0.78722700 | C | 1.96759900  | -0.28892300 | -2.34734500 |
| C    | -1.21969800 | 3.98040000  | -0.81749900 | H | 1.11890600  | -0.46737600 | -1.68933100 |
| C    | -0.02241300 | 4.62381800  | -1.05582100 | H | 2.18865800  | 0.77900400  | -2.32849800 |
| H    | 2.13397700  | 4.44939900  | -0.91310500 | H | 1.67462600  | -0.54984900 | -3.36919500 |
| H    | -2.14977800 | 4.51546300  | -0.96673000 | C | -3.78068800 | 2.36083200  | -0.26216700 |
| H    | -0.00533900 | 5.64822300  | -1.40453000 | H | -3.79892000 | 3.37025600  | -0.66834500 |
| N    | -0.04085900 | 1.94055600  | -0.22628900 | H | -4.32558800 | 2.36401100  | 0.68612000  |
| C    | 2.29576000  | 1.82276900  | -0.05119500 | H | -4.34357100 | 1.71038700  | -0.93703900 |
| C    | 3.69866100  | 2.30668400  | -0.31625700 | H | 4.11477600  | 1.81125400  | -1.19806600 |
| H    | 3.72727900  | 3.37988000  | -0.47967800 | C | -2.92668200 | -1.26067600 | -2.00636900 |
| H    | 4.35247600  | 2.06046900  | 0.52102800  | C | -3.84095700 | -1.91638300 | -3.05676900 |
| C    | 3.16193200  | -0.24422700 | 0.51915900  | H | -4.77451400 | -1.36092700 | -3.18171000 |
| C    | 3.73980400  | -0.29021700 | 1.79466100  | H | -3.31783200 | -1.92620400 | -4.01546800 |
| C    | 4.84199900  | -1.07830400 | 2.07670700  | H | -4.07959200 | -2.95302600 | -2.81178400 |
| C    | 5.39183500  | -1.84995500 | 1.05911600  | C | -2.43993400 | 0.06683100  | -2.61758500 |
| C    | 4.82169100  | -1.80835300 | -0.20462300 | H | -3.25579000 | 0.78844200  | -2.70733200 |
| C    | 3.70430000  | -1.02138700 | -0.52742600 | H | -1.63670200 | 0.50946300  | -2.03393800 |
| H    | 5.26073500  | -1.09266600 | 3.07593300  | H | -2.06267800 | -0.13773200 | -3.62453700 |
| H    | 6.25043400  | -2.48400800 | 1.24496300  | C | -1.70797000 | -2.17615700 | -1.80815500 |
| H    | 5.25729500  | -2.42868800 | -0.97816200 | H | -1.01786000 | -1.75823800 | -1.07507900 |
| C    | 3.17742200  | -1.15675800 | -1.97413600 | H | -2.01942800 | -3.16263600 | -1.45321600 |
| C    | -2.36872700 | 1.86922400  | -0.08452500 | H | -1.17900300 | -2.29886300 | -2.75992000 |
| N    | -2.08920000 | 0.59054900  | 0.28710800  | C | 0.94390700  | -2.58119600 | 1.00267900  |
|      |             |             |             | H | 0.88940400  | -3.65172500 | 1.23224600  |
|      |             |             |             | H | 1.90632000  | -2.24527500 | 0.64469300  |

|                                              |             |             |                       |   |             |             |             |
|----------------------------------------------|-------------|-------------|-----------------------|---|-------------|-------------|-------------|
| C                                            | -0.10998900 | -1.76137600 | 1.17932300            | C | -3.22302000 | -0.79356800 | 2.13772100  |
| C                                            | -1.33113900 | -2.49139200 | 1.72593600            | C | 2.37220400  | 1.90867600  | -0.31648600 |
| H                                            | -2.16570300 | -2.47177100 | 1.02255300            | N | 2.08630700  | 0.57219900  | -0.38424400 |
| H                                            | -1.11434100 | -3.54402100 | 1.95581100            | C | 3.20535100  | -0.27888900 | -0.36693500 |
| H                                            | -1.71330000 | -2.02847500 | 2.64225500            | C | 3.87053900  | -0.50615000 | -1.58150400 |
| C                                            | -0.36107500 | 0.35219300  | 3.03401200            | C | 3.67704000  | -0.92020400 | 0.81140900  |
| H                                            | -1.37800100 | -0.02093500 | 3.04509200            | C | 4.96304700  | -1.35482500 | -1.68409900 |
| C                                            | -0.13861700 | 1.59004900  | 2.52393600            | H | 3.47662000  | 0.00741100  | -2.45164500 |
| H                                            | 0.84163000  | 2.05169600  | 2.59996700            | C | 4.78605600  | -1.76559800 | 0.67475500  |
| H                                            | -0.94616000 | 2.21489300  | 2.16468200            | C | 5.42468600  | -1.99340400 | -0.54124900 |
| C                                            | 0.63399700  | -0.40368100 | 3.87060000            | H | 5.44266800  | -1.51564800 | -2.64305500 |
| H                                            | 0.28481900  | -0.44290200 | 4.90799500            | H | 5.17581600  | -2.27499100 | 1.54469300  |
| H                                            | 0.77143400  | -1.41931100 | 3.50157000            | H | 6.27483400  | -2.66421500 | -0.58489500 |
| H                                            | 1.60054500  | 0.10079800  | 3.86305300            | H | -3.30356400 | 0.11428200  | -2.54079200 |
| Zero-point correction=                       |             |             | 0.738666 Hartree      | C | -4.41102800 | -0.48468900 | 3.07053300  |
| Sum of electronic and thermal Free Energies= |             |             | -1649.3627387 Hartree | H | -5.17904900 | -1.25899200 | 3.04997200  |
| Number of imaginary frequencies=             |             |             | 0                     | H | -4.04906900 | -0.40323700 | 4.09881600  |

## 2TSe2

-1 1

|    |             |             |             |   |             |             |             |
|----|-------------|-------------|-------------|---|-------------|-------------|-------------|
| Fe | 0.08117300  | 0.22769300  | -0.72021400 | H | -2.32271800 | -2.15016900 | 3.56916300  |
| N  | -2.05750100 | 0.62898100  | -0.39488700 | H | -3.34102000 | -2.97183400 | 2.37349900  |
| C  | -1.11875400 | 2.73922700  | -0.09421700 | C | -2.14789900 | 0.26248500  | 2.43612000  |
| C  | 1.26354900  | 2.73210400  | -0.16478900 | H | -1.24716000 | 0.12325500  | 1.84121100  |
| C  | -1.15664600 | 4.10757200  | 0.05426600  | H | -2.50470300 | 1.27979100  | 2.26752500  |
| C  | 1.25288200  | 4.13130600  | -0.00405900 | H | -1.88389700 | 0.17407200  | 3.49461000  |
| C  | 0.06895300  | 4.82159300  | 0.13411000  | C | 3.78793600  | 2.41884900  | -0.30068300 |
| H  | -2.09368100 | 4.64538500  | 0.07870400  | H | 3.81893400  | 3.48994000  | -0.11016200 |
| H  | 2.18832100  | 4.67775800  | -0.00773700 | H | 4.29704100  | 2.22918800  | -1.25059300 |
| H  | 0.06798300  | 5.89729400  | 0.25652900  | H | 4.38194400  | 1.91951000  | 0.47048500  |
| N  | 0.04789300  | 2.02466800  | -0.10419400 | H | -4.26974100 | 2.25514200  | -0.99711700 |
| C  | -2.29346900 | 1.90833800  | -0.22394900 | C | 2.98147200  | -0.79085600 | 2.18152500  |
| C  | -3.69209200 | 2.45591400  | -0.09222800 | C | 3.83693200  | -1.39219600 | 3.30865100  |
| H  | -4.21874300 | 1.96189100  | 0.72904600  | H | 4.81895300  | -0.91517000 | 3.36867000  |
| H  | -3.69267400 | 3.52523700  | 0.09383900  | H | 3.32217300  | -1.23108600 | 4.25852600  |
| C  | -3.19474500 | -0.21080700 | -0.44358200 | H | 3.97571300  | -2.46920200 | 3.19260400  |
| C  | -3.75943000 | -0.41468300 | -1.71218400 | C | 2.69007200  | 0.66811700  | 2.57835700  |
| C  | -4.82584500 | -1.27519200 | -1.91089500 | H | 3.60244800  | 1.27001300  | 2.55276800  |
| C  | -5.35147100 | -1.95581000 | -0.81766500 | H | 1.94565600  | 1.12074400  | 1.92829400  |
| C  | -4.80399400 | -1.74490900 | 0.43981900  | H | 2.30908300  | 0.68026500  | 3.60452600  |
| C  | -3.72960000 | -0.87342800 | 0.68121700  | C | 1.65299000  | -1.56543700 | 2.15052300  |
| H  | -5.23145100 | -1.42050100 | -2.90509100 | H | 0.99929300  | -1.17887100 | 1.36868300  |
| H  | -6.17585500 | -2.64808200 | -0.93934200 | H | 1.82751800  | -2.62782300 | 1.96013700  |
| H  | -5.22218800 | -2.29548400 | 1.27332700  | H | 1.14373000  | -1.46225100 | 3.11490000  |



|                                              |             |             |                       |   |             |             |             |
|----------------------------------------------|-------------|-------------|-----------------------|---|-------------|-------------|-------------|
| C                                            | -0.98483800 | -2.56968300 | -0.63462600           | H | -4.86745900 | -1.99026200 | -2.94868000 |
| H                                            | -0.98896500 | -3.58446500 | -0.23138300           | H | -5.84146300 | -3.21248600 | -0.99810800 |
| H                                            | -1.95058900 | -2.09815500 | -0.72345300           | H | -5.14667700 | -2.63621700 | 1.25775200  |
| C                                            | 0.16078700  | -1.98895800 | -1.02300300           | C | -3.37878800 | -0.76322600 | 2.15880100  |
| C                                            | 1.38089600  | -2.88756700 | -1.00203000           | C | 2.13144300  | 2.16647400  | -0.16996700 |
| H                                            | 2.24473900  | -2.43855900 | -0.52187000           | N | 1.93465800  | 0.79834500  | -0.06357500 |
| H                                            | 1.15517800  | -3.83042900 | -0.49281600           | C | 3.09586600  | 0.01386800  | -0.14724500 |
| H                                            | 1.68685100  | -3.13426100 | -2.02549500           | C | 3.78411400  | -0.00190900 | -1.37659500 |
| C                                            | 0.29979000  | -0.92006500 | -2.67923400           | C | 3.62501300  | -0.75305200 | 0.92882900  |
| H                                            | 1.35181100  | -1.16932600 | -2.78190700           | C | 4.92813700  | -0.75496300 | -1.58840700 |
| C                                            | 0.03901900  | 0.48257900  | -2.71831500           | H | 3.35655300  | 0.59760100  | -2.17249500 |
| H                                            | -0.92967300 | 0.81168300  | -3.08711100           | C | 4.77679800  | -1.51199900 | 0.68119800  |
| H                                            | 0.86314400  | 1.16517100  | -2.89405100           | C | 5.42840000  | -1.52974500 | -0.54819700 |
| C                                            | -0.60865400 | -1.81328100 | -3.51473200           | H | 5.41430600  | -0.74529400 | -2.55766700 |
| H                                            | -0.46983400 | -1.55364300 | -4.56952200           | H | 5.19798700  | -2.10873900 | 1.47828300  |
| H                                            | -0.40504600 | -2.87555800 | -3.37366200           | H | 6.31591000  | -2.13707700 | -0.68199700 |
| H                                            | -1.65114700 | -1.63195800 | -3.25054100           | H | -3.17140200 | -0.22130600 | -2.52908200 |
| Zero-point correction=                       |             |             | 0.73835 Hartree       | C | -4.11731100 | -1.66302400 | 3.16047500  |
| Sum of electronic and thermal Free Energies= |             |             | -1648.5995709 Hartree | H | -3.87744200 | -2.71784500 | 3.00933200  |
| Number of imaginary frequencies=             |             |             | 1                     | H | -3.79983300 | -1.39004400 | 4.16906000  |

## 2IMe4

|      |             |             |             |   |             |             |             |
|------|-------------|-------------|-------------|---|-------------|-------------|-------------|
| -1 1 |             |             |             | H | -5.20142100 | -1.53565000 | 3.10533700  |
| Fe   | 0.00262900  | 0.29748200  | -0.46718100 | C | -1.87441600 | -0.95368400 | 2.39979400  |
| N    | -2.18334400 | 0.55178600  | -0.31310400 | H | -1.28564500 | -0.28615500 | 1.77224700  |
| C    | -1.40766200 | 2.75498100  | -0.38114500 | H | -1.64176600 | -0.73535700 | 3.44670100  |
| C    | 0.97707700  | 2.92246900  | -0.23961200 | H | -1.57472300 | -1.98212700 | 2.18723900  |
| C    | -1.56385400 | 4.11984700  | -0.43381500 | C | -3.76323100 | 0.68914500  | 2.49452700  |
| C    | 0.84375500  | 4.33478800  | -0.27455500 | H | -3.17165400 | 1.40267700  | 1.92452100  |
| C    | -0.38948700 | 4.92985100  | -0.36188500 | H | -4.82423300 | 0.86435400  | 2.29684400  |
| H    | -2.53692900 | 4.57617200  | -0.54788800 | H | -3.57795700 | 0.87438400  | 3.55645400  |
| H    | 1.73154100  | 4.95592700  | -0.25425400 | C | 3.50377200  | 2.77783700  | -0.07191000 |
| H    | -0.47424400 | 6.00920600  | -0.39554500 | H | 3.43867700  | 3.84943800  | 0.11393500  |
| N    | -0.20060300 | 2.15314600  | -0.23614500 | H | 4.10662300  | 2.62956200  | -0.97358900 |
| C    | -2.51467300 | 1.80774200  | -0.44375400 | H | 4.06767700  | 2.32810400  | 0.75111200  |
| C    | -3.93413400 | 2.27330600  | -0.65159400 | H | -4.63845100 | 1.57896200  | -0.19563900 |
| H    | -4.08316800 | 3.25975300  | -0.21830500 | C | 2.99872400  | -0.75644000 | 2.33230300  |
| H    | -4.16779300 | 2.32684100  | -1.71833100 | C | 3.86503800  | -1.50845400 | 3.35391600  |
| C    | -3.20288500 | -0.42762900 | -0.41330700 | H | 4.86558200  | -1.07578800 | 3.43396700  |
| C    | -3.62576900 | -0.75853000 | -1.70680100 | H | 3.38602900  | -1.43682700 | 4.33355000  |
| C    | -4.56809200 | -1.75035500 | -1.93549100 | H | 3.95946700  | -2.56926600 | 3.10991000  |
| C    | -5.10806100 | -2.42854400 | -0.85216200 | C | 2.82499700  | 0.67725600  | 2.86504300  |
| C    | -4.70100200 | -2.09530900 | 0.43566700  | H | 3.79537300  | 1.17821500  | 2.92809500  |
| C    | -3.75182700 | -1.10121100 | 0.70524300  | H | 2.16488500  | 1.25732600  | 2.22419600  |
|      |             |             |             | H | 2.39828800  | 0.63732200  | 3.87266300  |
|      |             |             |             | C | 1.63341700  | -1.45517800 | 2.29214200  |

|                                              |             |             |                       |   |             |             |             |
|----------------------------------------------|-------------|-------------|-----------------------|---|-------------|-------------|-------------|
| H                                            | 0.96772800  | -0.93792700 | 1.60479900            | C | -4.81317400 | -2.34753800 | -1.40412000 |
| H                                            | 1.74298300  | -2.48997500 | 1.95671700            | C | -4.53598600 | -2.20121700 | -0.04873900 |
| H                                            | 1.18279300  | -1.45628500 | 3.29070100            | C | -3.66856900 | -1.22246800 | 0.45380900  |
| C                                            | -0.31645300 | -2.39151500 | -0.58302600           | H | -4.41177300 | -1.58757100 | -3.38101300 |
| H                                            | -0.34205100 | -3.04581600 | 0.28171000            | H | -5.48551700 | -3.13049900 | -1.73388300 |
| H                                            | -1.21747300 | -1.84322500 | -0.82367300           | H | -5.01709000 | -2.88393700 | 0.63671600  |
| C                                            | 0.76569900  | -2.34037700 | -1.37361900           | C | -3.41874000 | -1.11945700 | 1.96792100  |
| C                                            | 1.96527700  | -3.21286400 | -1.11854900           | C | 2.09348200  | 2.33275800  | 0.25335900  |
| H                                            | 2.86225800  | -2.60559000 | -0.98642300           | N | 1.92269400  | 0.99516500  | 0.18264200  |
| H                                            | 1.82907900  | -3.84192200 | -0.23710100           | C | 3.04168000  | 0.20094800  | -0.13183400 |
| H                                            | 2.13817100  | -3.86287000 | -1.98242800           | C | 3.59514900  | 0.36243600  | -1.41366200 |
| C                                            | 0.82959900  | -1.44173100 | -2.59760400           | C | 3.57225100  | -0.79490600 | 0.72737700  |
| H                                            | 1.87864200  | -1.14090400 | -2.68377800           | C | 4.62095700  | -0.44223000 | -1.88367800 |
| C                                            | -0.02779100 | -0.18452400 | -2.41670500           | H | 3.14037800  | 1.11180400  | -2.05103900 |
| H                                            | -1.04146400 | -0.39500300 | -2.79248900           | C | 4.60233500  | -1.59737600 | 0.21921600  |
| H                                            | 0.37200700  | 0.62219100  | -3.04420500           | C | 5.12318500  | -1.44362700 | -1.06181800 |
| C                                            | 0.47782500  | -2.25784600 | -3.85580300           | H | 5.00343900  | -0.30451300 | -2.88848700 |
| H                                            | 1.10678800  | -3.14555800 | -3.98432900           | H | 5.02246500  | -2.37483000 | 0.84180000  |
| H                                            | -0.56442000 | -2.58271100 | -3.79649500           | H | 5.91305000  | -2.10075200 | -1.40553600 |
| H                                            | 0.58790700  | -1.63000000 | -4.74330500           | H | -2.84906400 | 0.16042000  | -2.54148100 |
| Zero-point correction=                       |             |             | 0.74002 Hartree       | C | -3.86985200 | 0.24993100  | 2.50526000  |
| Sum of electronic and thermal Free Energies= |             |             | -1649.3984357 Hartree | H | -4.92734500 | 0.42252800  | 2.28618300  |
| Number of imaginary frequencies=             |             |             | 0                     | H | -3.73874600 | 0.27281400  | 3.59130900  |

## 2IMe5

-1 1

|    |             |             |             |   |             |             |             |
|----|-------------|-------------|-------------|---|-------------|-------------|-------------|
| Fe | -0.02803000 | 0.45120000  | -0.16610100 | H | -3.98228100 | -2.06431200 | 3.81216500  |
| N  | -2.11673100 | 0.63739700  | -0.16180200 | H | -5.27951200 | -2.08622700 | 2.61430200  |
| C  | -1.48652000 | 2.85478700  | 0.08328000  | C | -1.92997300 | -1.31775600 | 2.29036700  |
| C  | 0.89782200  | 3.07016500  | 0.29850400  | H | -1.55954800 | -2.25799400 | 1.87665700  |
| C  | -1.64177500 | 4.22148700  | 0.18721900  | H | -1.33675400 | -0.50476400 | 1.87631100  |
| C  | 0.75494200  | 4.45235900  | 0.41152400  | H | -1.78952000 | -1.32931000 | 3.37633900  |
| C  | -0.50665500 | 5.03923800  | 0.37295900  | C | 3.45763000  | 2.96732200  | 0.32480300  |
| H  | -2.62247100 | 4.67236700  | 0.10414000  | H | 3.94974400  | 3.01055700  | -0.65097600 |
| H  | 1.63316800  | 5.08008600  | 0.50541300  | H | 4.11082700  | 2.38635000  | 0.98068400  |
| H  | -0.61492200 | 6.11298400  | 0.45436700  | H | 3.39424600  | 3.98110900  | 0.71734300  |
| N  | -0.24039700 | 2.26067500  | 0.19471200  | H | -4.63976600 | 1.59725600  | 0.08446400  |
| C  | -2.52452900 | 1.90016100  | -0.15170200 | C | 3.07414000  | -1.00072400 | 2.16526400  |
| C  | -3.95627100 | 2.30065600  | -0.39285400 | C | 3.20046600  | 0.30876600  | 2.96312200  |
| H  | -4.15392200 | 3.29622200  | -0.00059100 | H | 2.58017800  | 1.08998800  | 2.52782600  |
| H  | -4.19076200 | 2.29948100  | -1.46124000 | H | 2.87392600  | 0.14066500  | 3.99422100  |
| C  | -3.06317500 | -0.36092700 | -0.49354400 | H | 4.24096900  | 0.64557700  | 2.98431700  |
| C  | -3.35528400 | -0.50852600 | -1.85606200 | C | 1.60788300  | -1.45757600 | 2.17521300  |
| C  | -4.21883100 | -1.48974500 | -2.31938100 | H | 0.96725700  | -0.67021400 | 1.78363200  |

|                                              |             |               |             |   |             |             |             |
|----------------------------------------------|-------------|---------------|-------------|---|-------------|-------------|-------------|
| H                                            | 1.46528500  | -2.35365100   | 1.56776800  | N | -0.48099100 | 2.38139800  | -0.06065200 |
| H                                            | 1.29459700  | -1.67627200   | 3.20186300  | C | -2.74029100 | 1.84789400  | -0.38425200 |
| C                                            | 3.88806400  | -2.06753900   | 2.91109400  | C | -4.20179200 | 2.13172000  | -0.60856000 |
| H                                            | 3.78063500  | -3.05354200   | 2.45227700  | H | -4.47063800 | 3.12406900  | -0.25109800 |
| H                                            | 4.95016700  | -1.81369300   | 2.95844800  | H | -4.44897500 | 2.07049200  | -1.67256400 |
| H                                            | 3.51218000  | -2.13644600   | 3.93461800  | C | -3.10805100 | -0.48392500 | -0.56255800 |
| C                                            | 0.25486000  | -0.64633200   | -1.87046300 | C | -3.38989200 | -0.79917000 | -1.89814400 |
| H                                            | -0.68532900 | -0.86462000   | -2.40068000 | C | -4.16550700 | -1.89401400 | -2.24720700 |
| H                                            | 0.80830700  | 0.03961500    | -2.52986600 | C | -4.67590200 | -2.70244500 | -1.24100300 |
| C                                            | 1.08242800  | -1.94302900   | -1.83106100 | C | -4.40715100 | -2.39215700 | 0.08791100  |
| H                                            | 2.04872800  | -1.73125500   | -1.36206500 | C | -3.63172900 | -1.29156100 | 0.47801800  |
| C                                            | 1.40112300  | -2.44214700   | -3.25680500 | H | -4.35682000 | -2.11554900 | -3.29063400 |
| H                                            | 1.93768700  | -1.66102100   | -3.80005600 | H | -5.27793500 | -3.57139100 | -1.47880400 |
| H                                            | 2.01932900  | -3.34559200   | -3.27096400 | H | -4.82389300 | -3.04036500 | 0.84498800  |
| H                                            | 0.46883300  | -2.65236600   | -3.78859700 | C | -3.41075300 | -1.00304800 | 1.97588600  |
| C                                            | -0.80471300 | -3.14725000   | -0.68997400 | C | 1.84008500  | 2.59532800  | -0.21832900 |
| H                                            | -1.19511700 | -3.99315400   | -0.13090000 | N | 1.75230000  | 1.24881000  | -0.23274400 |
| H                                            | -1.49906700 | -2.36333700   | -0.95789700 | C | 2.94989400  | 0.51610900  | -0.37928300 |
| C                                            | 0.48287000  | -3.08512100   | -1.03439100 | C | 3.47569100  | 0.41707300  | -1.67613600 |
| H                                            | -0.48768900 | 3.86921900    | -2.58431600 | C | 3.60514900  | -0.15798200 | 0.68592800  |
| C                                            | 1.43602800  | -4.19617700   | -0.65921000 | C | 4.59974000  | -0.34159700 | -1.96685400 |
| H                                            | 1.78587100  | -4.73515000   | -1.54435300 | H | 2.94384700  | 0.94285500  | -2.45936200 |
| H                                            | 2.32485900  | -3.78489800   | -0.17035900 | C | 4.74265300  | -0.90838600 | 0.35938100  |
| H                                            | 0.96380000  | -4.91611900   | 0.01217200  | C | 5.23840700  | -1.01719900 | -0.93648000 |
| C                                            | -0.04503700 | 2.97628200    | -3.02380600 | H | 4.96226400  | -0.40927800 | -2.98611100 |
| H                                            | 1.00894800  | 2.93651000    | -2.74911100 | H | 5.26806600  | -1.43921300 | 1.14049000  |
| H                                            | -0.14851800 | 2.99645600    | -4.10954200 | H | 6.11521300  | -1.62423500 | -1.12854600 |
| H                                            | -0.52812800 | 2.09378300    | -2.60705000 | H | -2.94897200 | -0.16207100 | -2.65506700 |
| Zero-point correction=                       |             | 0.7858149     | Hartree     | C | -3.98901400 | 0.36927400  | 2.36388600  |
| Sum of electronic and thermal Free Energies= |             | -1689.9066304 | Hartree     | H | -5.04850600 | 0.43276000  | 2.10113600  |
| Number of imaginary frequencies=             |             |               | 0           | H | -3.89848000 | 0.50337100  | 3.44595200  |

## 2TSe3

|      |             |            |             |   |             |             |             |
|------|-------------|------------|-------------|---|-------------|-------------|-------------|
| -1 1 |             |            |             | H | -3.72217800 | -3.05075400 | 2.68613300  |
| Fe   | -0.18119500 | 0.59062400 | -0.53176100 | H | -3.90746400 | -1.79366400 | 3.90994500  |
| N    | -2.24374600 | 0.61549900 | -0.35134700 | H | -5.19004500 | -2.04844300 | 2.72266800  |
| C    | -1.76359300 | 2.87917900 | -0.21159300 | C | -1.91830200 | -1.02758500 | 2.33710800  |
| C    | 0.60069800  | 3.26133100 | -0.11940100 | H | -1.48154500 | -2.00525600 | 2.12153400  |
| C    | -2.00928600 | 4.23831200 | -0.16474300 | H | -1.37326500 | -0.26799600 | 1.77881000  |
| C    | 0.37487900  | 4.63505700 | -0.05761000 | H | -1.80136100 | -0.82434600 | 3.40661500  |
| C    | -0.92747900 | 5.13280300 | -0.03920500 | C | 3.16250400  | 3.31267600  | -0.24883900 |
| H    | -3.01816000 | 4.62147600 | -0.25519700 | H | 3.63892000  | 3.23344900  | -1.23028400 |
| H    | 1.20945000  | 5.32619100 | -0.05825900 | H | 3.85864900  | 2.87644300  | 0.47154800  |
| H    | -1.10432200 | 6.19975600 | 0.00324900  | H | 3.04302700  | 4.36854000  | -0.01290600 |

|                                              |             |             |                       |   |             |             |             |
|----------------------------------------------|-------------|-------------|-----------------------|---|-------------|-------------|-------------|
| H                                            | -4.82392200 | 1.39756000  | -0.09608200           | C | 0.93131900  | -3.25318000 | -0.45085800 |
| C                                            | 3.10151300  | -0.13198400 | 2.13975100            | C | -1.46827400 | -3.06337700 | -0.52048700 |
| C                                            | 2.96175400  | 1.30653000  | 2.66691100            | C | 0.83186900  | -4.63086500 | -0.35806700 |
| H                                            | 2.21712100  | 1.86709900  | 2.10605700            | C | -1.58203200 | -4.44486900 | -0.43147400 |
| H                                            | 2.64783600  | 1.27321500  | 3.71466800            | C | -0.43443900 | -5.23947400 | -0.33809400 |
| H                                            | 3.92071000  | 1.83029000  | 2.61852100            | H | 1.72245700  | -5.24498300 | -0.30356100 |
| C                                            | 1.73878000  | -0.83455200 | 2.23236600            | H | -2.55858000 | -4.91405700 | -0.43049400 |
| H                                            | 1.00649700  | -0.31146600 | 1.62089100            | H | -0.52052700 | -6.31581200 | -0.26220600 |
| H                                            | 1.80322600  | -1.86986200 | 1.88705300            | N | -0.21044400 | -2.46658600 | -0.49851900 |
| H                                            | 1.39365100  | -0.83391300 | 3.27177900            | C | 2.12140200  | -2.47246300 | -0.47203300 |
| C                                            | 4.05801000  | -0.86420900 | 3.09273900            | C | 3.50300800  | -3.06536000 | -0.44190500 |
| H                                            | 4.13831100  | -1.92667200 | 2.85156900            | H | 3.46655200  | -4.15227200 | -0.42108500 |
| H                                            | 5.05852900  | -0.42351300 | 3.08733500            | H | 4.07749700  | -2.75605900 | -1.31922000 |
| H                                            | 3.66057500  | -0.78631500 | 4.10727400            | C | 3.03271000  | -0.30239200 | -0.53321100 |
| C                                            | -0.01819700 | -1.62695300 | -0.74336900           | C | 3.50921100  | 0.03060400  | -1.81456800 |
| H                                            | -0.23884900 | -1.68603900 | 0.32282000            | C | 4.59623300  | 0.86643300  | -2.00390900 |
| H                                            | -0.86104900 | -2.12610100 | -1.24349700           | C | 5.23279300  | 1.40784200  | -0.89038500 |
| C                                            | 1.26544300  | -2.40691400 | -1.02822900           | C | 4.76023300  | 1.09538500  | 0.37504300  |
| H                                            | 2.12030600  | -1.83012300 | -0.66201800           | C | 3.66467600  | 0.24506700  | 0.60606000  |
| C                                            | 1.47023100  | -2.57648700 | -2.54408800           | H | 4.93433300  | 1.10124000  | -3.00633800 |
| H                                            | 1.52362200  | -1.59763100 | -3.02244500           | H | 6.08124500  | 2.07234400  | -1.00286200 |
| H                                            | 2.39075700  | -3.11488400 | -2.78273800           | H | 5.26727600  | 1.53087500  | 1.22772900  |
| H                                            | 0.62649500  | -3.12632500 | -2.97118100           | C | 3.30393100  | -0.00393400 | 2.08704200  |
| C                                            | 0.31205300  | -4.41988300 | 0.15066900            | C | -2.51044600 | -2.10890200 | -0.58971900 |
| H                                            | 0.43125600  | -5.39041800 | 0.62171800            | N | -2.09060800 | -0.83540100 | -0.59327100 |
| H                                            | -0.68557700 | -4.00176100 | 0.10178400            | C | -3.06917300 | 0.17919100  | -0.61042000 |
| C                                            | 1.36252700  | -3.76476500 | -0.34688400           | C | -3.39251500 | 0.69895100  | -1.87714400 |
| H                                            | -0.82841400 | 1.41701500  | -2.68703200           | C | -3.70627300 | 0.70720500  | 0.53730100  |
| C                                            | 2.75401300  | -4.33927300 | -0.23929800           | C | -4.33537700 | 1.69758000  | -2.04891500 |
| H                                            | 3.20869500  | -4.47013500 | -1.22482300           | H | -2.85691300 | 0.27643800  | -2.71730000 |
| H                                            | 3.39977700  | -3.64666300 | 0.30947100            | C | -4.66224600 | 1.71655400  | 0.32407900  |
| H                                            | 2.75309800  | -5.30392200 | 0.27137200            | C | -4.98578200 | 2.21128200  | -0.93048700 |
| C                                            | -0.18439000 | 0.53506900  | -2.69150100           | H | -4.55753700 | 2.07162900  | -3.04152100 |
| H                                            | -0.04923200 | -0.47861000 | -1.73650000           | H | -5.16922800 | 2.14139900  | 1.18197100  |
| H                                            | 0.80171400  | 0.82205300  | -3.05982300           | H | -5.72896200 | 2.99367400  | -1.02921900 |
| H                                            | -0.61191100 | -0.18679900 | -3.39656100           | H | 2.96888100  | -0.39133900 | -2.65264400 |
| Zero-point correction=                       |             |             | 0.784449 Hartree      | C | 4.51332300  | -0.64916300 | 2.79144500  |
| Sum of electronic and thermal Free Energies= |             |             | -1689.8680316 Hartree | H | 5.40032900  | -0.01449000 | 2.75085300  |
| Number of imaginary frequencies=             |             |             | 1                     | H | 4.27079500  | -0.82817700 | 3.84290300  |
|                                              |             |             |                       | H | 4.76112100  | -1.60759500 | 2.33107800  |
|                                              |             |             |                       | C | 3.00525200  | 1.34393200  | 2.77417300  |
| <b>2IMe6</b>                                 |             |             |                       | H | 2.12161200  | 1.81223700  | 2.33793600  |
| -1 1                                         |             |             |                       | H | 2.81009700  | 1.17332000  | 3.83682600  |
| Fe                                           | -0.05647600 | -0.64156500 | -0.77656200           | H | 3.83810100  | 2.04477300  | 2.69430100  |
| N                                            | 1.90958800  | -1.15667200 | -0.49954700           | H |             |             |             |

|   |             |             |             |                                              |                                     |
|---|-------------|-------------|-------------|----------------------------------------------|-------------------------------------|
| C | 2.09072200  | -0.90828600 | 2.34553300  | Zero-point correction=                       | 0.7854922 Hartree                   |
| H | 1.18960000  | -0.53179200 | 1.86304300  | Sum of electronic and thermal Free Energies= | -1689.8965627 Hartree               |
| H | 2.24341400  | -1.92717500 | 1.99059800  | Number of imaginary frequencies=             | 0                                   |
| H | 1.92539000  | -0.94408800 | 3.42739400  |                                              |                                     |
| C | -3.96836800 | -2.47569200 | -0.62794000 | <b>2PCa</b>                                  |                                     |
| H | -4.10016100 | -3.55164600 | -0.72361700 | O 1                                          |                                     |
| H | -4.46474600 | -1.99241100 | -1.47360400 | Fe                                           | 0.00223500 0.27050700 -0.76569200   |
| H | -4.49366200 | -2.14499000 | 0.27384800  | N                                            | -2.04573300 0.44594600 -0.50714600  |
| H | 4.06188400  | -2.72228600 | 0.43395100  | C                                            | -1.34899200 2.59756800 -0.05334300  |
| C | -3.45149500 | 0.32417800  | 2.01243700  | C                                            | 1.02819600 2.69346200 0.17620800    |
| C | -4.77284600 | -0.13453300 | 2.65923400  | C                                            | -1.43674800 3.95632800 0.21707600   |
| H | -5.16630300 | -1.01677500 | 2.15061100  | C                                            | 0.95408200 4.05096800 0.45783400    |
| H | -4.59299300 | -0.39692500 | 3.70576400  | C                                            | -0.28453500 4.69395900 0.49486200   |
| H | -5.53984100 | 0.64119200  | 2.63407400  | H                                            | -2.40238000 4.44507500 0.21782400   |
| C | -2.42055700 | -0.78633600 | 2.26385500  | H                                            | 1.85849600 4.61662700 0.63884100    |
| H | -2.72874000 | -1.74700700 | 1.85225000  | H                                            | -0.34835700 5.75004500 0.71547800   |
| H | -1.44696700 | -0.55391100 | 1.83491100  | N                                            | -0.12296200 1.94377100 -0.02632700  |
| H | -2.31202900 | -0.89947200 | 3.34750400  | C                                            | -2.42648800 1.69785700 -0.30125700  |
| C | -2.95079100 | 1.57574900  | 2.76240400  | C                                            | -3.86791300 2.12386400 -0.23585000  |
| H | -2.00059400 | 1.91889400  | 2.34947600  | H                                            | -3.97036400 3.17952600 -0.47972000  |
| H | -3.66187200 | 2.40164700  | 2.70424500  | H                                            | -4.46711100 1.54567200 -0.93863900  |
| H | -2.79814500 | 1.33329200  | 3.81819500  | C                                            | -3.04969000 -0.56427300 -0.48379300 |
| C | 2.36938000  | 3.62010200  | -0.69971100 | C                                            | -3.49983000 -1.01661500 -1.73334000 |
| H | 2.63387800  | 3.51546900  | 0.35612900  | C                                            | -4.44128600 -2.02263700 -1.86370000 |
| H | 3.09365800  | 4.29697500  | -1.15988900 | C                                            | -4.95417800 -2.60822700 -0.71208900 |
| C | 0.95806600  | 4.17960500  | -0.85062800 | C                                            | -4.51980700 -2.16020800 0.52510000  |
| H | 0.75001400  | 4.29555900  | -1.92306900 | C                                            | -3.57171200 -1.13565400 0.69973800  |
| C | 0.87553000  | 5.57308700  | -0.20886300 | H                                            | -4.76765000 -2.34109300 -2.84583400 |
| H | 1.66015500  | 6.22145200  | -0.60638300 | H                                            | -5.68817200 -3.40184900 -0.77217600 |
| H | -0.08568900 | 6.05469500  | -0.39302700 | H                                            | -4.94261300 -2.62808400 1.40430600  |
| H | 1.01600200  | 5.49274600  | 0.87249000  | C                                            | -3.25500200 -0.77972000 2.17395800  |
| C | 0.13213700  | 2.08126100  | 0.24743800  | C                                            | 2.20762200 1.89875400 0.05881300    |
| H | -0.68357400 | 1.44508100  | 0.57819900  | N                                            | 1.97847900 0.63488900 -0.25307800   |
| H | 1.13669900  | 1.69011600  | 0.34709900  | C                                            | 3.09284100 -0.23877600 -0.39076300  |
| C | -0.12402100 | 3.26643200  | -0.31035500 | C                                            | 3.63728300 -0.31481500 -1.68304700  |
| H | 0.18675700  | -0.38249800 | -3.36270700 | C                                            | 3.62703200 -1.03394800 0.64608500   |
| C | -1.54360300 | 3.74280900  | -0.48457800 | C                                            | 4.65273700 -1.19795300 -2.00593000  |
| H | -1.76370600 | 4.60225200  | 0.15625800  | H                                            | 3.22415700 0.34819200 -2.43416400   |
| H | -1.71564600 | 4.05581100  | -1.51923400 | C                                            | 4.64681600 -1.92930500 0.27669400   |
| H | -2.25152000 | 2.94948100  | -0.25070800 | C                                            | 5.15060600 -2.03283000 -1.01085900  |
| C | 0.11790900  | 0.33919700  | -2.53625200 | H                                            | 5.04415300 -1.23664800 -3.01470400  |
| H | 2.46987400  | 2.64194600  | -1.17049400 | H                                            | 5.07592000 -2.56740200 1.03842800   |
| H | -0.72940300 | 1.00393500  | -2.75237700 | H                                            | 5.93523900 -2.74665700 -1.22752400  |
| H | 1.01954600  | 0.96687500  | -2.58434900 | H                                            | -3.08324400 -0.53841600 -2.60748200 |

|   |             |             |             |                                              |             |              |             |
|---|-------------|-------------|-------------|----------------------------------------------|-------------|--------------|-------------|
| C | -4.56444200 | -0.34838500 | 2.86649600  | C                                            | 1.00450500  | -2.74454700  | -1.92040000 |
| H | -5.30451800 | -1.14873300 | 2.89023600  | H                                            | 0.99686900  | -2.52505200  | -2.98840200 |
| H | -4.34961100 | -0.05914300 | 3.89828800  | H                                            | 1.98681700  | -2.49459700  | -1.51896300 |
| H | -5.01193400 | 0.50779500  | 2.35852200  | H                                            | 0.86164400  | -3.82421600  | -1.81581000 |
| C | -2.72527100 | -2.03474200 | 2.89860100  | Zero-point correction=                       |             | 0.754667     | Hartree     |
| H | -1.76428600 | -2.35299000 | 2.49213800  | Sum of electronic and thermal Free Energies= |             | -1649.272312 | Hartree     |
| H | -2.58435700 | -1.80518400 | 3.95760300  | Number of imaginary frequencies=             |             | 0            |             |
| H | -3.41441500 | -2.87610200 | 2.82741400  |                                              |             |              |             |
| C | -2.23661800 | 0.34443400  | 2.42396400  | <b>2TSa1</b>                                 |             |              |             |
| H | -1.28667500 | 0.19377000  | 1.91457400  | O 1                                          |             |              |             |
| H | -2.61676300 | 1.32072400  | 2.12559400  | Fe                                           | -0.01408900 | 0.18084200   | -0.71421300 |
| H | -2.04864800 | 0.38605200  | 3.50002500  | N                                            | -2.05331200 | 0.48305600   | -0.51480100 |
| C | 3.59290800  | 2.44663300  | 0.26365200  | C                                            | -1.26076500 | 2.64075000   | -0.53172600 |
| H | 3.57079400  | 3.44190900  | 0.69997000  | C                                            | 1.10424500  | 2.69693800   | -0.47798800 |
| H | 4.13018800  | 2.49355800  | -0.68672900 | C                                            | -1.30812700 | 4.02683300   | -0.55225200 |
| H | 4.16905700  | 1.79394800  | 0.91999300  | C                                            | 1.08626300  | 4.08422000   | -0.49519000 |
| H | -4.28668800 | 1.96414200  | 0.76081500  | C                                            | -0.12775600 | 4.76925700   | -0.52570000 |
| C | 3.28539900  | -0.99092400 | 2.15452700  | H                                            | -2.26882400 | 4.52479700   | -0.59012200 |
| C | 4.56110300  | -0.57349000 | 2.91600300  | H                                            | 2.02288100  | 4.62739200   | -0.48905700 |
| H | 4.90876300  | 0.40809800  | 2.58803000  | H                                            | -0.15322800 | 5.84962900   | -0.53785500 |
| H | 4.34437300  | -0.51752700 | 3.98576100  | N                                            | -0.06209500 | 1.95966100   | -0.46941200 |
| H | 5.37553800  | -1.28441500 | 2.77226600  | C                                            | -2.38396000 | 1.74966900   | -0.53071700 |
| C | 2.17912200  | -0.01301500 | 2.58181500  | C                                            | -3.79220700 | 2.27981800   | -0.50003300 |
| H | 2.46958800  | 1.02621500  | 2.42824900  | H                                            | -3.97478400 | 2.90014500   | -1.37986700 |
| H | 1.23828000  | -0.17413100 | 2.06001600  | H                                            | -4.51697800 | 1.46961100   | -0.49244500 |
| H | 2.01093700  | -0.15055100 | 3.65319500  | C                                            | -3.08308200 | -0.49407600  | -0.39772500 |
| C | 2.87926800  | -2.39329100 | 2.65053500  | C                                            | -3.54858700 | -1.01822200  | -1.61083800 |
| H | 1.94994500  | -2.73001800 | 2.19040900  | C                                            | -4.49167300 | -2.02972200  | -1.65989500 |
| H | 3.64535000  | -3.14179000 | 2.44782200  | C                                            | -4.99048700 | -2.53241800  | -0.46301100 |
| H | 2.72537400  | -2.35885300 | 3.73171900  | C                                            | -4.56011900 | -1.98621700  | 0.73606100  |
| C | 0.22414300  | 1.37193400  | -2.59462600 | C                                            | -3.61405100 | -0.94917500  | 0.82660800  |
| H | -0.69292800 | 1.93372000  | -2.74602100 | H                                            | -4.83062600 | -2.41538900  | -2.61319000 |
| H | 1.09746700  | 1.94836400  | -2.31937000 | H                                            | -5.72164600 | -3.33084000  | -0.45997400 |
| C | 0.31358400  | 0.07931400  | -3.02353500 | H                                            | -4.99024400 | -2.37458400  | 1.64997900  |
| H | 1.28717700  | -0.39465300 | -3.04026200 | C                                            | -3.34926500 | -0.40426900  | 2.25009900  |
| C | -0.74252300 | -0.53098300 | -3.90936600 | C                                            | 2.26877900  | 1.86114400   | -0.45501900 |
| H | -0.36158700 | -0.57679700 | -4.93379700 | N                                            | 2.00214400  | 0.57921700   | -0.46526600 |
| H | -1.03045100 | -1.54224300 | -3.62388200 | C                                            | 3.08213700  | -0.34695800  | -0.40777400 |
| H | -1.63211300 | 0.09899500  | -3.92186800 | C                                            | 3.56790000  | -0.77428700  | -1.65255600 |
| C | 0.03751400  | -1.70337100 | 0.14984500  | C                                            | 3.63633700  | -0.85143900  | 0.78589900  |
| H | 1.00071400  | -1.80504700 | 0.63005700  | C                                            | 4.55134000  | -1.74196500  | -1.76082900 |
| H | -0.82733700 | -1.56203600 | 0.78043900  | H                                            | 3.13932900  | -0.31832600  | -2.53695100 |
| C | -0.09228000 | -2.03862000 | -1.16478000 | C                                            | 4.62398600  | -1.84139800  | 0.63381300  |
| H | -1.09588300 | -2.11611700 | -1.56960100 | C                                            | 5.07200600  | -2.29684400  | -0.59663100 |

|   |             |             |             |                                              |             |                      |             |
|---|-------------|-------------|-------------|----------------------------------------------|-------------|----------------------|-------------|
| H | 4.90197800  | -2.05772400 | -2.73523300 | H                                            | 0.85870400  | -1.48199700          | 1.10489800  |
| H | 5.07149000  | -2.26652600 | 1.52269100  | H                                            | -0.95827800 | -1.37548600          | 1.08815200  |
| H | 5.83353700  | -3.06496300 | -0.64252200 | C                                            | -0.06327400 | -2.09612100          | -0.74095400 |
| H | -3.14624400 | -0.58698800 | -2.51830000 | H                                            | -1.05782400 | -2.45072500          | -1.00044000 |
| C | -4.68241400 | 0.14851500  | 2.79528400  | C                                            | 1.00740100  | -3.17351600          | -0.85827800 |
| H | -5.45112600 | -0.62177800 | 2.86612100  | H                                            | 1.10721000  | -3.58722100          | -1.86295100 |
| H | -4.52374100 | 0.56172300  | 3.79460200  | H                                            | 1.97789600  | -2.77901500          | -0.55537100 |
| H | -5.05913100 | 0.94591600  | 2.15081800  | H                                            | 0.75396300  | -3.99203200          | -0.18023500 |
| C | -2.88416900 | -1.55010000 | 3.17121000  | Zero-point correction=                       |             | 0.757093 Hartree     |             |
| H | -1.91614900 | -1.94112100 | 2.85591700  | Sum of electronic and thermal Free Energies= |             | -1649.251409 Hartree |             |
| H | -2.78248800 | -1.17102300 | 4.19091300  | Number of imaginary frequencies=             |             |                      | 1           |
| H | -3.59254600 | -2.37820100 | 3.19374400  |                                              |             |                      |             |
| C | -2.32104400 | 0.73189000  | 2.38432800  | <b>2IMa1</b>                                 |             |                      |             |
| H | -1.35714600 | 0.49708700  | 1.93683900  | O 1                                          |             |                      |             |
| H | -2.68342300 | 1.66074900  | 1.94426000  | Fe                                           | -0.04946000 | 0.28517800           | 0.25257900  |
| H | -2.17455500 | 0.91851800  | 3.45136500  | N                                            | 1.98816900  | 0.70788400           | 0.04388600  |
| C | 3.64847300  | 2.45922800  | -0.39007100 | C                                            | 1.06555800  | 2.82132600           | -0.28239500 |
| H | 3.74009900  | 3.11820500  | 0.47598300  | C                                            | -1.27005400 | 2.77628800           | -0.28606600 |
| H | 3.84054700  | 3.05620700  | -1.28408900 | C                                            | 1.07324000  | 4.20647700           | -0.41816000 |
| H | 4.40956200  | 1.68595600  | -0.32284800 | C                                            | -1.33118800 | 4.16057800           | -0.41870200 |
| H | -3.95268000 | 2.90164500  | 0.38353000  | C                                            | -0.14249100 | 4.88219700           | -0.49169100 |
| C | 3.34918200  | -0.40276600 | 2.23692500  | H                                            | 2.00835700  | 4.74880300           | -0.45417600 |
| C | 4.65610600  | 0.17743100  | 2.81579200  | H                                            | -2.28611400 | 4.66719600           | -0.45473200 |
| H | 4.99322000  | 1.03020500  | 2.22222600  | H                                            | -0.16305300 | 5.95877800           | -0.59417300 |
| H | 4.48089800  | 0.52036500  | 3.83865100  | N                                            | -0.08940000 | 2.13006300           | -0.22658800 |
| H | 5.46041300  | -0.55877200 | 2.83896200  | C                                            | 2.24875300  | 1.95796900           | -0.14116200 |
| C | 2.27126000  | 0.67707800  | 2.42779600  | C                                            | 3.62043300  | 2.56383700           | -0.23472500 |
| H | 2.59033900  | 1.64087200  | 2.03055400  | H                                            | 3.82916200  | 3.16900800           | 0.65077700  |
| H | 1.31904500  | 0.41827400  | 1.96900500  | H                                            | 4.38167400  | 1.79212900           | -0.31329800 |
| H | 2.11984600  | 0.80609500  | 3.50264100  | C                                            | 3.06290500  | -0.20187300          | 0.28357800  |
| C | 2.93738600  | -1.61933600 | 3.08964100  | C                                            | 3.57847600  | -0.17349300          | 1.58546800  |
| H | 1.99719200  | -2.04725100 | 2.74030100  | C                                            | 4.57280400  | -1.04945700          | 1.98604700  |
| H | 3.69121300  | -2.40674500 | 3.07984100  | C                                            | 5.05810800  | -1.97689600          | 1.07117500  |
| H | 2.80249200  | -1.30132700 | 4.12619500  | C                                            | 4.55535300  | -1.98846500          | -0.22108000 |
| C | 0.05741700  | 0.23170400  | -2.64875800 | C                                            | 3.56121300  | -1.10483900          | -0.67118600 |
| H | -0.87797000 | 0.54811500  | -3.10717100 | H                                            | 4.94985600  | -1.01580600          | 3.00008200  |
| H | 0.91024600  | 0.83371900  | -2.95233100 | H                                            | 5.82364500  | -2.68656500          | 1.35802500  |
| C | 0.26023600  | -1.20116100 | -2.49787700 | H                                            | 4.94989900  | -2.72090300          | -0.91277500 |
| H | 1.30449700  | -1.48674000 | -2.55930800 | C                                            | 3.12392400  | -1.24106300          | -2.14053600 |
| C | -0.61870700 | -2.09694300 | -3.35624900 | C                                            | -2.41825300 | 1.86376600           | -0.16075800 |
| H | -0.33034900 | -1.97610900 | -4.40345400 | N                                            | -2.10366300 | 0.62165600           | -0.00133300 |
| H | -0.53128700 | -3.15344400 | -3.10069100 | C                                            | -3.11621200 | -0.35980200          | 0.19243400  |
| H | -1.66636500 | -1.81882800 | -3.26412800 | C                                            | -3.73482800 | -0.37394500          | 1.44339400  |
| C | -0.04240400 | -1.36546200 | 0.51432200  | C                                            | -3.42806100 | -1.32031600          | -0.78941600 |

|   |             |             |             |                                              |                      |             |             |
|---|-------------|-------------|-------------|----------------------------------------------|----------------------|-------------|-------------|
| C | -4.66508300 | -1.35097200 | 1.76778500  | H                                            | -0.65078200          | 0.91413900  | 4.84085100  |
| H | -3.44296000 | 0.38065500  | 2.16383800  | H                                            | -0.46627700          | -0.81394700 | 5.16931100  |
| C | -4.37152200 | -2.28847000 | -0.42706200 | H                                            | 0.93287800           | 0.14872600  | 4.67229600  |
| C | -4.97885900 | -2.31864600 | 0.82424100  | C                                            | 0.00647100           | -1.59444900 | 0.98764500  |
| H | -5.12651000 | -1.35720200 | 2.74692300  | H                                            | -0.98396600          | -2.07722200 | 0.91272100  |
| H | -4.64398700 | -3.05373400 | -1.13825900 | H                                            | 0.71746400           | -2.29001700 | 0.51120900  |
| H | -5.69341600 | -3.09905900 | 1.05314500  | C                                            | 0.35331900           | -1.48250900 | 2.48067400  |
| H | 3.15027000  | 0.53703500  | 2.28211100  | H                                            | 1.42273500           | -1.24610900 | 2.57583700  |
| C | 4.36659500  | -1.27621200 | -3.05143300 | C                                            | 0.08771700           | -2.77643100 | 3.25527600  |
| H | 5.00420300  | -2.13897800 | -2.86246100 | H                                            | 0.43321200           | -2.73378700 | 4.29242900  |
| H | 4.04626800  | -1.32888300 | -4.09470400 | H                                            | -0.98679200          | -2.98924700 | 3.26258500  |
| H | 4.96655300  | -0.37265000 | -2.92098800 | H                                            | 0.58881700           | -3.61658400 | 2.76832200  |
| C | 2.34531100  | -2.55855400 | -2.29322900 | Zero-point correction=                       | 0.754605 Hartree     |             |             |
| H | 1.45359600  | -2.54575700 | -1.66582600 | Sum of electronic and thermal Free Energies= | -1649.276998 Hartree |             |             |
| H | 2.04217300  | -2.69447000 | -3.33538900 | Number of imaginary frequencies=             | 0                    |             |             |
| H | 2.95558000  | -3.41430400 | -1.99904900 |                                              |                      |             |             |
| C | 2.24031700  | -0.10411500 | -2.66878900 | <b>2TSa2</b>                                 |                      |             |             |
| H | 1.29836400  | -0.02727400 | -2.13002100 | 0 1                                          |                      |             |             |
| H | 2.75036200  | 0.86094100  | -2.61881100 | Fe                                           | -0.00152600          | 0.37300400  | 0.21972600  |
| H | 2.01318600  | -0.30845800 | -3.71815900 | N                                            | 1.96647700           | 0.67394300  | -0.17368800 |
| C | -3.81389800 | 2.41589900  | -0.23490700 | C                                            | 1.10270600           | 2.76260800  | -0.63557800 |
| H | -3.90914800 | 3.07228700  | -1.10182800 | C                                            | -1.29141300          | 2.71666700  | -0.52992000 |
| H | -4.03385300 | 3.00443500  | 0.65898100  | C                                            | 1.06897900           | 4.11940700  | -0.92795000 |
| H | -4.54499900 | 1.61548300  | -0.31146400 | C                                            | -1.33706100          | 4.07246300  | -0.81974000 |
| H | 3.67925000  | 3.21519100  | -1.10869200 | C                                            | -0.15375900          | 4.78505500  | -1.03293300 |
| C | -2.84183900 | -1.29051600 | -2.20940100 | H                                            | 1.99296200           | 4.66678900  | -1.06241000 |
| C | -3.22740100 | -2.54671800 | -3.00428100 | H                                            | -2.28924700          | 4.58415600  | -0.87023500 |
| H | -4.30646100 | -2.62286400 | -3.15075600 | H                                            | -0.18452800          | 5.84149100  | -1.25904200 |
| H | -2.76657000 | -2.49126100 | -3.99219800 | N                                            | -0.07783400          | 2.04523400  | -0.47538100 |
| H | -2.87127800 | -3.45540000 | -2.51471100 | C                                            | 2.24965300           | 1.93193000  | -0.48444400 |
| C | -3.40625100 | -0.07651500 | -2.96809200 | C                                            | 3.65255500           | 2.42441800  | -0.71001100 |
| H | -4.49730900 | -0.11664700 | -3.00233200 | H                                            | 4.17552600           | 2.60151700  | 0.23247400  |
| H | -3.10728400 | 0.86110900  | -2.49909300 | H                                            | 4.22734400           | 1.67692500  | -1.25933200 |
| H | -3.02782400 | -0.07392800 | -3.99385200 | C                                            | 3.04076900           | -0.23095500 | 0.04524500  |
| C | -1.30407400 | -1.21841700 | -2.20199700 | C                                            | 3.73988100           | -0.07452100 | 1.25316900  |
| H | -0.95673200 | -0.22329000 | -1.91166900 | C                                            | 4.73500500           | -0.95262400 | 1.64620200  |
| H | -0.87900600 | -1.95353600 | -1.51834300 | C                                            | 5.04147300           | -2.02663900 | 0.81756600  |
| H | -0.92408200 | -1.40753000 | -3.20974500 | C                                            | 4.37651200           | -2.16517900 | -0.39150000 |
| C | -0.12485600 | 0.93032200  | 2.15486700  | C                                            | 3.38618300           | -1.27348400 | -0.83798300 |
| H | 0.85240400  | 1.35987100  | 2.42895400  | H                                            | 5.24977500           | -0.80950500 | 2.58810800  |
| H | -0.87213400 | 1.72469900  | 2.31499500  | H                                            | 5.79817300           | -2.74666100 | 1.10243200  |
| C | -0.42118900 | -0.28273300 | 3.03938800  | H                                            | 4.64274800           | -3.00370000 | -1.02050600 |
| H | -1.48569900 | -0.53560100 | 2.93378400  | C                                            | 2.77986400           | -1.53835100 | -2.23020000 |
| C | -0.14168000 | 0.00152300  | 4.51834800  | C                                            | -2.38813200          | 1.84934300  | -0.25150400 |



|   |             |             |             |                                              |             |              |             |
|---|-------------|-------------|-------------|----------------------------------------------|-------------|--------------|-------------|
| N | -2.04254100 | 0.59137100  | -0.00930900 | H                                            | -0.73741300 | 1.66011000   | 2.25368800  |
| C | -3.07273900 | -0.30724000 | 0.39052000  | C                                            | 0.27460300  | 0.07675700   | 3.45858400  |
| C | -3.51084800 | -0.18821300 | 1.71569900  | H                                            | -0.71561800 | -0.11756400  | 3.88952000  |
| C | -3.61578900 | -1.30612100 | -0.44951900 | C                                            | 1.19173800  | 0.63810600   | 4.53575200  |
| C | -4.47625200 | -1.03065900 | 2.24690500  | H                                            | 0.81497400  | 1.59029900   | 4.91596600  |
| H | -3.05548600 | 0.58578400  | 2.32395800  | H                                            | 1.28009800  | -0.05184300  | 5.37817900  |
| C | -4.59051400 | -2.13792100 | 0.11870300  | H                                            | 2.19248500  | 0.80774600   | 4.13003900  |
| C | -5.02028300 | -2.01636800 | 1.43556600  | C                                            | -0.13024000 | -0.98366200  | 1.54458800  |
| H | -4.79329800 | -0.91733000 | 3.27611100  | H                                            | -1.17146700 | -1.22523000  | 1.75618300  |
| H | -5.03934100 | -2.91313200 | -0.48418300 | H                                            | 0.18193800  | -1.47303500  | 0.56561100  |
| H | -5.77570400 | -2.69140500 | 1.81760600  | C                                            | 0.73879400  | -1.20521100  | 2.76487000  |
| H | 3.45239500  | 0.75451700  | 1.89011900  | H                                            | 1.79237500  | -1.10051900  | 2.49467200  |
| C | 3.90334400  | -1.88760600 | -3.22816600 | C                                            | 0.50671000  | -2.51077900  | 3.51143600  |
| H | 4.41061900  | -2.82238600 | -2.99160900 | H                                            | 1.08036500  | -2.53559800  | 4.44066700  |
| H | 3.47210700  | -1.99829900 | -4.22532300 | H                                            | -0.55201000 | -2.62226500  | 3.76103000  |
| H | 4.64948500  | -1.09096900 | -3.26370700 | H                                            | 0.80724600  | -3.37031600  | 2.90896500  |
| C | 1.82426800  | -2.73787200 | -2.12448300 | Zero-point correction=                       |             | 0.755343     | Hartree     |
| H | 1.00456500  | -2.51742800 | -1.43911300 | Sum of electronic and thermal Free Energies= |             | -1649.246172 | Hartree     |
| H | 1.39700700  | -2.96636500 | -3.10486900 | Number of imaginary frequencies=             |             | 1            |             |
| H | 2.34619000  | -3.62494400 | -1.75907100 |                                              |             |              |             |
| C | 2.02038600  | -0.35568200 | -2.85185200 | <b>2IMa2</b>                                 |             |              |             |
| H | 1.12676600  | -0.08253600 | -2.29532500 | 0 1                                          |             |              |             |
| H | 2.65557700  | 0.52996000  | -2.92556600 | Fe                                           | 0.08383400  | 0.46549200   | -0.54086600 |
| H | 1.72242100  | -0.63956600 | -3.86454100 | N                                            | -1.84364900 | 1.03073700   | -0.34983300 |
| C | -3.81382600 | 2.32939800  | -0.23714900 | C                                            | -0.82737700 | 3.08598300   | -0.56172200 |
| H | -3.92357000 | 3.23936000  | -0.82310600 | C                                            | 1.56444200  | 2.80570500   | -0.70211000 |
| H | -4.15129800 | 2.53257500  | 0.78195000  | C                                            | -0.67322600 | 4.45941200   | -0.67494800 |
| H | -4.47542900 | 1.56860000  | -0.65032800 | C                                            | 1.71859300  | 4.17742300   | -0.82391000 |
| H | 3.65236400  | 3.34896400  | -1.28284400 | C                                            | 0.60104400  | 5.01900100   | -0.80404700 |
| C | -3.19982900 | -1.49710400 | -1.91795000 | H                                            | -1.54384000 | 5.10279800   | -0.67261700 |
| C | -3.97850700 | -2.63826800 | -2.58823500 | H                                            | 2.70771300  | 4.60223600   | -0.93731900 |
| H | -5.05349200 | -2.44564900 | -2.60116400 | H                                            | 0.72195200  | 6.08940000   | -0.89212100 |
| H | -3.64367600 | -2.72502000 | -3.62353000 | N                                            | 0.29245600  | 2.24977700   | -0.55547100 |
| H | -3.79710500 | -3.59774000 | -2.09939100 | C                                            | -2.02925200 | 2.34602300   | -0.44535400 |
| C | -3.46927100 | -0.22513600 | -2.74058900 | C                                            | -3.39420700 | 2.97208000   | -0.40465900 |
| H | -4.52378800 | 0.05545400  | -2.68211200 | H                                            | -3.94001300 | 2.79627900   | -1.33492100 |
| H | -2.85784300 | 0.60982700  | -2.40419700 | H                                            | -3.98891300 | 2.53517200   | 0.40064600  |
| H | -3.22860600 | -0.41716400 | -3.78944600 | C                                            | -2.97583700 | 0.17935000   | -0.26698600 |
| C | -1.70818300 | -1.85251200 | -2.00732900 | C                                            | -3.61230400 | -0.11659900  | -1.48304600 |
| H | -1.09132900 | -1.02242900 | -1.66453600 | C                                            | -4.64226900 | -1.03892100  | -1.57008500 |
| H | -1.48619800 | -2.73548800 | -1.40240700 | C                                            | -5.04571400 | -1.70014400  | -0.41451000 |
| H | -1.43884900 | -2.06874600 | -3.04509800 | C                                            | -4.44214300 | -1.38546300  | 0.79441800  |
| C | 0.11392800  | 0.98086700  | 2.22039500  | C                                            | -3.42014400 | -0.42896200  | 0.92534300  |
| H | 1.03254300  | 1.53732400  | 2.03248600  | H                                            | -5.10693500 | -1.25149600  | -2.52507600 |

|   |             |             |             |                                              |             |              |             |
|---|-------------|-------------|-------------|----------------------------------------------|-------------|--------------|-------------|
| H | -5.82989400 | -2.44591500 | -0.44881400 | H                                            | 1.31180300  | -1.67912900  | 2.32593100  |
| H | -4.78374900 | -1.90534700 | 1.68009700  | H                                            | 1.52705700  | -0.35344600  | 3.47874400  |
| C | -2.90963400 | -0.16103300 | 2.35546800  | C                                            | 0.09375400  | -1.42574100  | -1.92975100 |
| C | 2.57823200  | 1.81429100  | -0.67731000 | H                                            | -0.51529400 | -0.53049700  | -2.18489800 |
| N | 2.12702400  | 0.57723900  | -0.46786200 | H                                            | 1.08949400  | -1.32456600  | -2.34745800 |
| C | 3.06361900  | -0.49358800 | -0.45603700 | C                                            | -0.68883400 | -2.71911500  | -2.28327500 |
| C | 3.49789200  | -0.95044400 | -1.70727900 | H                                            | 0.04891200  | -3.50792200  | -2.46414200 |
| C | 3.52811000  | -1.12393200 | 0.72568400  | C                                            | -1.71300200 | -2.69172900  | -3.40043600 |
| C | 4.34243900  | -2.04309100 | -1.84216400 | H                                            | -1.23586900 | -2.51490400  | -4.36682800 |
| H | 3.14598100  | -0.41399200 | -2.58158800 | H                                            | -2.24566600 | -3.64392400  | -3.45559100 |
| C | 4.37110900  | -2.23051500 | 0.55127600  | H                                            | -2.44732800 | -1.90497500  | -3.22513800 |
| C | 4.77029300  | -2.69822800 | -0.69662000 | C                                            | -0.00106200 | -1.86000100  | -0.43597600 |
| H | 4.65651700  | -2.37293900 | -2.82459500 | H                                            | 0.90806600  | -2.38203700  | -0.13553300 |
| H | 4.74526600  | -2.75025900 | 1.42035900  | H                                            | -0.23975400 | -1.13585300  | 0.37864600  |
| H | 5.42290600  | -3.55970800 | -0.76266400 | C                                            | -1.15979200 | -2.81131300  | -0.81448000 |
| H | -3.24524600 | 0.39074700  | -2.36858100 | H                                            | -2.11451000 | -2.29278900  | -0.70364300 |
| C | -4.11783000 | 0.12657200  | 3.27084200  | C                                            | -1.21096700 | -4.17433900  | -0.15150900 |
| H | -4.80383100 | -0.71656700 | 3.34783900  | H                                            | -1.97507200 | -4.80128300  | -0.61626100 |
| H | -3.76061200 | 0.35391900  | 4.27787900  | H                                            | -0.24858100 | -4.68419100  | -0.24427100 |
| H | -4.67810400 | 0.98921900  | 2.90360100  | H                                            | -1.44998500 | -4.08542200  | 0.91052100  |
| C | -2.18528400 | -1.41675700 | 2.87136300  | Zero-point correction=                       |             | 0.757372     | Hartree     |
| H | -1.29820900 | -1.62760100 | 2.27103000  | Sum of electronic and thermal Free Energies= |             | -1649.282946 | Hartree     |
| H | -1.86415200 | -1.26222100 | 3.90485700  | Number of imaginary frequencies=             |             | 0            |             |
| H | -2.83201900 | -2.29589900 | 2.84151800  |                                              |             |              |             |
| C | -1.96162400 | 1.03585000  | 2.51852300  |                                              |             |              |             |
| H | -1.03574000 | 0.92415100  | 1.95884900  |                                              |             |              |             |
| H | -2.43170900 | 1.96856700  | 2.20264800  |                                              |             |              |             |
| H | -1.71719200 | 1.12718300  | 3.58034600  |                                              |             |              |             |
| C | 4.03322500  | 2.13113400  | -0.88586800 |                                              |             |              |             |
| H | 4.24414600  | 3.17166600  | -0.64828000 |                                              |             |              |             |
| H | 4.32397300  | 1.95103400  | -1.92438700 |                                              |             |              |             |
| H | 4.66225000  | 1.49827000  | -0.26118600 |                                              |             |              |             |
| H | -3.32917200 | 4.04529700  | -0.24178600 |                                              |             |              |             |
| C | 3.20967600  | -0.62601700 | 2.14988600  |                                              |             |              |             |
| C | 3.89869000  | -1.48498700 | 3.22062200  |                                              |             |              |             |
| H | 4.98627800  | -1.46503900 | 3.12399600  |                                              |             |              |             |
| H | 3.64495400  | -1.08129600 | 4.20254900  |                                              |             |              |             |
| H | 3.55966200  | -2.52287400 | 3.19173700  |                                              |             |              |             |
| C | 3.71355500  | 0.81527000  | 2.34207700  |                                              |             |              |             |
| H | 4.78168900  | 0.88440300  | 2.12236400  |                                              |             |              |             |
| H | 3.17225500  | 1.51911800  | 1.71232100  |                                              |             |              |             |
| H | 3.56228400  | 1.11273800  | 3.38313600  |                                              |             |              |             |
| C | 1.70344300  | -0.66568200 | 2.44549100  |                                              |             |              |             |
| H | 1.16203300  | 0.01386100  | 1.78930400  |                                              |             |              |             |
